# Supplementary material for: Genome-wide analysis of the omega-3 fatty acid desaturase gene family in Gossypium
Source: PubMed Central journal article supplement (PMC4245742; doi:10.1186/s12870-014-0312-5), 2014-11-18
Supplement: 12870_2014_312_MOESM3_ESM.pdf [file 12870_2014_312_MOESM3_ESM.pdf]

| Gene target | Primers | Temperature (°C) |      |      |      |      | Temperature (°C) |      |      |      |      | Opt. Tm | Genomic fragment (bp) | mRNA fragment (bp) |
|-------------|---------|------------------|------|------|------|------|------------------|------|------|------|------|---------|-----------------------|--------------------|
|             |         | 54.9             | 57.2 | 62.6 | 67.8 | 69.5 | 54.9             | 57.2 | 62.6 | 67.8 | 69.5 |         |                       |                    |
| FAD3-1A     | 1, 2    |                  |      |      |      |      |                  |      |      |      |      | 67.8    | 720                   | 479                |
|             |         | pFAD3-1A         |      |      |      |      | pFAD3-1D         |      |      |      |      |         |                       |                    |
| FAD3-1D     | 40, 41  |                  |      |      |      |      |                  |      |      |      |      | 62.6    | 961                   | 526                |
|             |         | pFAD3-1A         |      |      |      |      | pFAD3-1D         |      |      |      |      |         |                       |                    |
| FAD3-2.1A   | 5, 6    |                  |      |      |      |      |                  |      |      |      |      | 67.8    | 1,135                 | 710                |
|             |         | pFAD3-2.1A       |      |      |      |      | pFAD3-2.1D       |      |      |      |      |         |                       |                    |
| FAD3-2.1A   | 5, 6    |                  |      |      |      |      |                  |      |      |      |      | 69.5    | 1,135                 | 710                |
|             |         | pFAD3-2.1A       |      |      |      |      | pFAD3-2.2A       |      |      |      |      |         |                       |                    |
| FAD3-2.1D   | 44, 45  |                  |      |      |      |      |                  |      |      |      |      | 57.2    | 915                   | 582                |
|             |         | pFAD3-2.1A       |      |      |      |      | pFAD3-2.1D       |      |      |      |      |         |                       |                    |
| FAD3-2.1D   | 44, 45  |                  |      |      |      |      |                  |      |      |      |      | 57.2    | 915                   | 582                |
|             |         | pFAD3-2.2A       |      |      |      |      | pFAD3-2.1D       |      |      |      |      |         |                       |                    |
| FAD3-2.2A   | 9, 10   |                  |      |      |      |      |                  |      |      |      |      | 57.2    | 634                   | 392                |
|             |         | pFAD3-2.2A       |      |      |      |      | pFAD3-2.1A       |      |      |      |      |         |                       |                    |
| FAD3-2.2A   | 9, 10   |                  |      |      |      |      |                  |      |      |      |      | 57.2    | 634                   | 392                |
|             |         | pFAD3-2.2A       |      |      |      |      | pFAD3-2.1D       |      |      |      |      |         |                       |                    |
