# Supplementary material for: Genome-wide analysis of the omega-3 fatty acid desaturase gene family in Gossypium
Source: PubMed Central journal article supplement (PMC4245742; doi:10.1186/s12870-014-0312-5), 2014-11-18

A

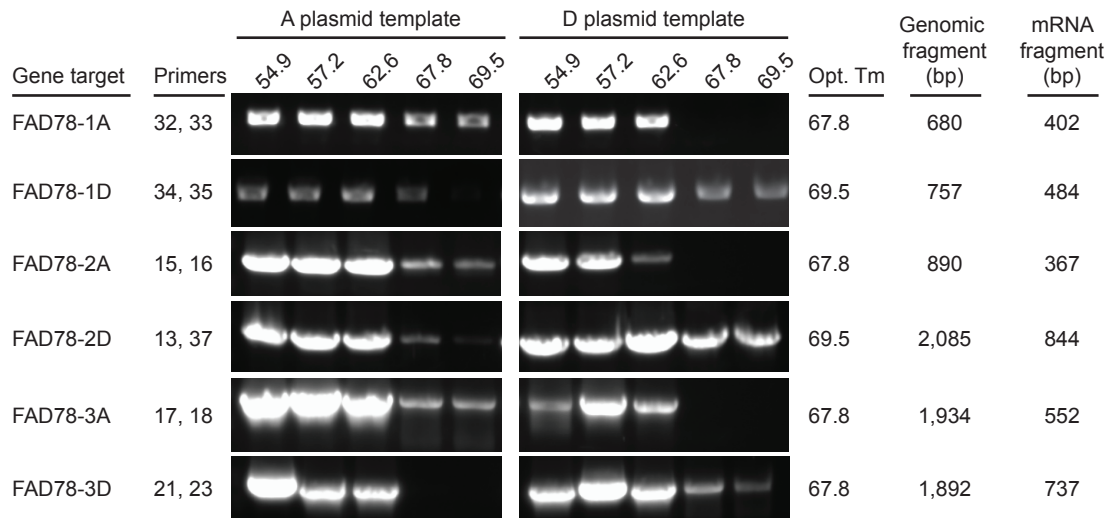

B

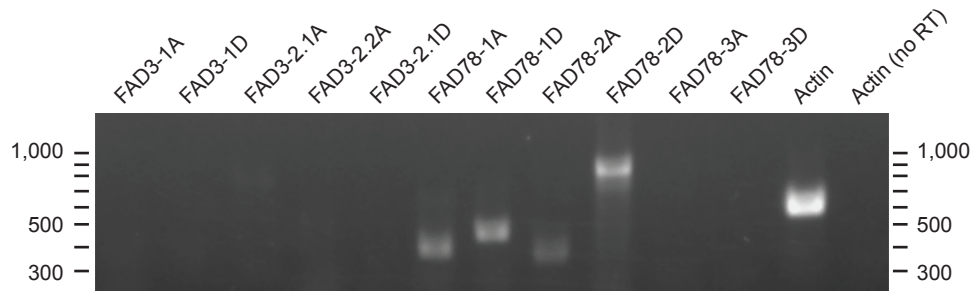

Supplement: 12870_2014_312_MOESM4_ESM.pdf [file 12870_2014_312_MOESM4_ESM.pdf]
