# Supplementary material for: Genome-wide analysis of the omega-3 fatty acid desaturase gene family in Gossypium
Source: PubMed Central journal article supplement (PMC4245742; doi:10.1186/s12870-014-0312-5), 2014-11-18
Supplement: 12870_2014_312_MOESM5_ESM.pdf [file 12870_2014_312_MOESM5_ESM.pdf]

## Additional file 2 – DNA sequencing primers

---

| Primer name   | Sequence (5' to 3')        |
|---------------|----------------------------|
| FAD3-1seq1F   | TTCCGTAGCTGGTTCTTTTGG      |
| FAD3-1seq2F   | TCACTTCAACCCATACAGCAACTT   |
| FAD3-1seq3F   | GGGCTTACAACAATAGACCGTGA    |
| FAD3-1seq1R   | CTGAGGAAAGAGATGATGAATGACA  |
| FAD3-1seq2R   | GGATGGACCGATTACAAAGGA      |
| FAD3-1seq3R   | GTTTTGATGGTGAGTTCTATGGCTT  |
| FAD3-2seq1F   | GTGGTGGGACATATCTTACATTCTTC |
| FAD3-2seq2F   | CGGTACAACATTTTCGACCTT      |
| FAD3-2seq3F   | TACATGACAGGAATGGAGTTATCT   |
| FAD3-2seq1R   | ACGAAAATCTACGAAACCAGAAT    |
| FAD3-2seq2R   | TCATCACAAGTTTCCTCTCTTGGG   |
| FAD3-2seq3R   | GTTCTGTGGCTTATTCTCCTGT     |
| FAD7/8-1seq1F | AACAAGAACAAGAGGCAGGG       |
| FAD7/8-1seq2F | AGAATTAGCCACAGGACTCACCA    |
| FAD7/8-1seq3F | CGAGAGCCGGAACAATCAG        |
| FAD7/8-1seq1R | TCCATCCATAGTCACGGTCAAG     |
| FAD7/8-1seq2R | CAAATCACTGCTGGGGTCGA       |
| FAD7/8-1seq3R | CAGTCATGACCAAGAACAAAAAGAG  |
| FAD7/8-2seq1F | TGGTGCAGCACCTCCTTTTA       |
| FAD7/8-2seq2F | GCAGGTCATCTTCTTCATTCTTC    |
| FAD7/8-2seq3F | GCTTGTTGGACGGCAATG         |
| FAD7/8-2seq4F | ATCATCTCTTCCCTCAAATCCC     |
| FAD7/8-2seq1R | CGTCGTCAGCCCTCCTCT         |
| FAD7/8-2seq2R | CGGATGGAAATGTGAACCC        |
| FAD7/8-2seq3R | GCAACACTATTCAAAGCTGGATT    |
| FAD7/8-2seq4R | TGTCACCTTCAATGGAGCACT      |
| FAD7/8-3seq1F | ATCTATTGCATTCTTTCATTCTTG   |
| FAD7/8-3seq2F | TACATCCAGCTTATGTTGGACA     |
| FAD7/8-3seq3F | CCACAATTAGCCAACTAGTGAC     |
| FAD7/8-3seq4F | TAAACTAGTCCCTTACGTTAAATCA  |
| FAD7/8-3seq1R | AAATAAGGCAAAATGCAATCTAA    |
| FAD7/8-3seq2R | CATAATAGCAACTTTAATACTCAATG |
| FAD7/8-3seq3R | TGTCCAACATAAGCTGGATGTA     |
| FAD7/8-3seq4R | CAAGAATGAAAGAATGCAATAGAT   |

---
