# Supplementary material for: Genome-wide analysis of the omega-3 fatty acid desaturase gene family in Gossypium
Source: PubMed Central journal article supplement (PMC4245742; doi:10.1186/s12870-014-0312-5), 2014-11-18
Supplement: 12870_2014_312_MOESM6_ESM.pdf [file 12870_2014_312_MOESM6_ESM.pdf]

**Additional file 3 – RT-PCR primers used for measuring homoeologous gene expression in *G. hirsutum***

| Primer name             | Gene target  | Sequence (5' to 3')          |
|-------------------------|--------------|------------------------------|
| <i>FAD3-1 primers</i>   |              |                              |
| S1F                     | GhiFAD3-1A   | GTGGTTTTCTTGTGTATTTATCCTC    |
| S2R                     | GhiFAD3-1A   | CATGCGGATTTGGGAGGA           |
| S40F                    | GhiFAD3-1D   | CCATGTTTTGGGCTC              |
| S41R                    | GhiFAD3-1D   | TCGTATCCGTGGTGG              |
| <i>FAD3-2 primers</i>   |              |                              |
| S5F                     | GhiFAD3-2.1A | GAACCACGGAAATGTCGAAAAT       |
| S6R                     | GhiFAD3-2.1A | GCAACTTAAACAGGTTTAGATCAGTCC  |
| S9F                     | GhiFAD3-2.2A | CTCCTCAATTCCGGATTGCC         |
| S10R                    | GhiFAD3-2.2A | GTAAATATTCTCAGGCAACGGC       |
| S44F                    | GhiFAD3-2.1D | TGAAAAGGGAGTATGCC            |
| S45R                    | GhiFAD3-2.1D | TAAACAAGTTGCTGTAAGGA         |
| <i>FAD7/8-1 primers</i> |              |                              |
| S32F                    | GhiFAD7/8-1A | ATTTGTTTGTCCCGACCGAAC        |
| S33R                    | GhiFAD7/8-1A | CCGGCTCTCGATAGTATTTTCG       |
| S34F                    | GhiFAD7/8-1D | GTCCCGACTGAAAGAAAAGATGTG     |
| S35R                    | GhiFAD7/8-1D | CAACATCCCCAGTGTCACTAACATAG   |
| <i>FAD7/8-2 primers</i> |              |                              |
| S15F                    | GhiFAD7/8-2A | GGCTTGCTTGCCATATTTGTCG       |
| S16R                    | GhiFAD7/8-2A | GTAATAAAAATGGTAAAGGCCCG      |
| S13F                    | GhiFAD7/8-2D | AGATAAAGGTAAAGAAGAGAGCACCCAC |
| S37R                    | GhiFAD7/8-2D | ATCCCGATCAAGCGTCGTC          |
| <i>FAD7/8-3 primers</i> |              |                              |
| S17F                    | GhiFAD7/8-3A | TTGGATAACAATGAACTAACATGGCT   |
| S18R                    | GhiFAD7/8-3A | GATGAGGTGAAAAGGTAGAGGTCTC    |
| S21F                    | GhiFAD7/8-3D | TTGGAGAGCAAGAAGAAGAGACAAT    |
| S23R                    | GhiFAD7/8-3D | TGATGCATGTATGTTACAAAATCCAA   |
