# Supplementary material for: Genome-wide analysis of the omega-3 fatty acid desaturase gene family in Gossypium
Source: PubMed Central journal article supplement (PMC4245742; doi:10.1186/s12870-014-0312-5), 2014-11-18
Supplement: 12870_2014_312_MOESM8_ESM.pdf [file 12870_2014_312_MOESM8_ESM.pdf]

GraFAD3-1D C9F CAAAGAGAGACGGGGAAGTGAAGAATGAGCCCTTCAATGAAGGAAACATCATTAGAAAC 60  
 GhiFAD3-1D C11F AATGAGCTCGGGGAAGTGAAGAATGAGCCCTTCAATGAAGGAAACATCATTAGAAAC 59  
 GheFAD3-1A C9F CAAAGAGAGACGGGGAAGTGAAGAATGAGCCCTTCAATGAAGGAAACATCATTAGAAAC 60  
 GhiFAD3-1A C11F AATGAGCTCGGGGAAGTGAAGAATGAGCCCTTCAATGAAGGAAACATCATTAGAAAC 59  
 \* \* \* \* \*

GraFAD3-1D AATGGAGAAAAAGGGAGAGGATGTTAATGGGATAATGAAGAAGGAGCAAGATAAGTTGTT 120  
 GhiFAD3-1D AATGGAGAAAAAGGGAGAGGATGTTAATGGGATAATGAAGAAGGAGCAAGATAAGTTGTT 119  
 GheFAD3-1A AATGGAGAAAAAGGGTGAAGGATGTTAATGGGATAATGAAGAAGGAGCAAGATAAGTTGTT 120  
 GhiFAD3-1A AATGGAGAAAAAGGGTGAAGGATGTTAATGGGATAATGAAGAAGGAGCAAGATAAGTTGTT 119  
 \* \* \* \* \*

GraFAD3-1D CGATCCAAGTGAAGCCCTCCTTTCCGTATTAATGATATCCGAGCTGCTATTCCAAAGCA 180  
 GhiFAD3-1D CGATCCAAGTGAAGCCCTCCTTTCCGTATTAATGATATCCGAGCTGCTATTCCAAAGCA 179  
 GheFAD3-1A CGATCCAAGTGAAGCCCTCCTTTCCGTATTAATGATATCCGAGCTGCTATTCCAAAGCA 180  
 GhiFAD3-1A CGATCCAAGTGAAGCCCTCCTTTCCGTATTAATGATATCCGAGCTGCTATTCCAAAGCA 179  
 \* \* \* \* \*

GraFAD3-1D CTGCTGGGTCAAGAACCCTTGGAGTCTATGAGTTATGTTTTTCAGGGACGCCATTGTCAT 240  
 GhiFAD3-1D CTGCTGGGTCAAGAACCCTTGGAGTCTATGAGTTATGTTTTTCAGGGACGCCATTGTCAT 239  
 GheFAD3-1A CTGTTGGGTCAAGAACCCTTGGAGTCTATGAGTTATGTTTTTCAGGGACGCCATTGTCAT 240  
 GhiFAD3-1A CTGTTGGGTCAAGAACCCTTGGAGTCTATGAGTTATGTTTTTCAGGGACGCCATTGTCAT 239  
 \* \* \* \* \*

GraFAD3-1D CTCTGCACTCTTAGCAGCTGCACTTTATTTCCGTAGCTGGTCTTTTGGCCTGTCTACTG 300  
 GhiFAD3-1D CTCTGCACTCTTAGCAGCTGCACTTTATTTCCGTAGCTGGTCTTTTGGCCTTTTCTACTG 299  
 GheFAD3-1A CTCTGCACTCTTAGCAGCTGCACTTTATTTCCGTAGCTGGTCTTTTGGCCTTTTCTACTG 300  
 GhiFAD3-1A CTCTGCACTCTTAGCAGCTGCACTTTATTTCCGTAGCTGGTCTTTTGGCCTTTTCTACTG 299  
 \* \* \* \* \*

-----S40F----->

GraFAD3-1D GGTTGCCCAAGGGACCATGTTTTGGGCTCTCTTTGTCCTTGGACATGATTGGTACCACGA 360  
 GhiFAD3-1D GGTTGCCCAAGGGACCATGTTTTGGGCTCTCTTTGTCCTTGGACATGATTGGTACCACGA 359  
 GheFAD3-1A GGTTGCCCAAGGGACCATGTTTTGGGCTCTCTTTGTCCTTGGACATGATTGGTACCACGA 360  
 GhiFAD3-1A GGTTGCCCAAGGGACCATGTTTTGGGCTCTCTTTGTCCTTGGACATGATTGGTACCACGA 359  
 \* \* \* \* \*

GraFAD3-1D CTCATTTTATCAATCTCTTTTTCACTTCCATTTTCCATTTCCGTTAATTAACCTCTGGGA 420  
 GhiFAD3-1D CTCATTTTATCAATCTCTTTTTCACTTCCATTTTCCATTTCCGTTAATTAACCTCTGGGA 419  
 GheFAD3-1A CTCATTTTATCAATCTCTTTTTCACTTCCATTTTCCATTTCCGTTAATTAACCTCTGGGA 420  
 GhiFAD3-1A CTCATTTTATCAATCTCTTTTTCACTTCCATTTTCCATTTCCGTTAATTAACCTCTGGGA 419  
 \* \* \* \* \*

GraFAD3-1D TTTTTGTTTTTGTTTTTGCAGTGGACATGGAAGCTTCTCTGATAATCCATACTTAATAA 480  
 GhiFAD3-1D TTTTTGTTTTTGTTTTTGCAGTGGACATGGAAGCTTCTCTGATAATCCATACTTAATAA 479  
 GheFAD3-1A TTTTTGTTTTTGTTTTTGCAGTGGACATGGAAGCTTCTCTGATAATCCATACTTAATAA 480  
 GhiFAD3-1A TTTTTGTTTTTGTTTTTGCAGTGGACATGGAAGCTTCTCTGATAATCCATACTTAATAA 479  
 \* \* \* \* \*

GraFAD3-1D CGTGATGGGACATATCTTACATTCTACCATCCTTGTTCCCTTACCATGGATGGTAAGTTCA 540  
 GhiFAD3-1D CGTGATGGGACATATCTTACATTCTACCATCCTTGTTCCCTTACCATGGATGGTAAGTTCA 539  
 GheFAD3-1A CGTGATGGGACATATCTTACATTCTACCATCCTTGTTCCCTTACCATGGATGGTAAGTTCA 540  
 GhiFAD3-1A CGTGATGGGACATATCTTACATTCTACCATCCTTGTTCCCTTACCATGGATGGTAAGTTCA 539  
 \* \* \* \* \*

GraFAD3-1D TGACTTGATTAGCTCAACATTTGTTCTTCATATACTATGGAACCTCATTGAACAATTTT 600  
 GhiFAD3-1D TGACTTGATTAGCTCAACATTTGTTCTTCATATACTATGGAACCTCATTGAACAATTTT 599  
 GheFAD3-1A TACTTTGATTAGCTCAACATTTGTTCTTCATATACTATGGAACCTCATTGAACAATTTT 600  
 GhiFAD3-1A TAAATTGATTAGCTCAACATTTGTTCTTCATATACTATGGAACCTCATTGAACAATTTT 599  
 \* \* \* \* \*

GraFAD3-1D TTATATAGGAGAATAAGCCATAGAACTCACCATCAAACCATGGAAATGTGGAGAAGGAT 660  
 GhiFAD3-1D TTATATAGGAGAATAAGCCATAGAACTCACCATCAAACCATGGAAATGTGGAGAAGGAT 659  
 GheFAD3-1A TTATATAGGAGAATAAGCCATAGAACTCACCATCAAACCATGGAAATGTGGAGAAGGAT 660  
 GhiFAD3-1A TTATATAGGAGAATAAGCCATAGAACTCACCATCAAACCATGGAAATGTGGAGAAGGAT 659  
 \* \* \* \* \*

GraFAD3-1D GAGTCTTGGGTCCGGTATGTATGTGCAATTGAATTCAGTTAGTTTCATGCAGTCGAAACT 720  
 GhiFAD3-1D GAGTCTTGGGTCCGGTATGTATGTGCAATTGAATTCAGTTAGTTTCATGCAGTCGAAACT 719  
 GheFAD3-1A GAGTCTTGGGTCCGGTATGTATGTGCAATTGAATTCAGTTAGTTTCATGCAGTCGAAACT 720  
 GhiFAD3-1A GAGTCTTGGGTCCGGTATGTATGTGCAATTGAATTCAGTTAGTTTCATGCAGTCGAAACT 719  
 \* \* \* \* \*

GraFAD3-1D CAAATATACATTCACTTTATATATATATACACTTTAAATTTTCAGATGTCCGAAGATCTTT 780  
 GhiFAD3-1D CAAATATACATTCACTTTATATATATATACACTTTAAATTTTCAGATGTCCGAAGATCTTT 779  
 GheFAD3-1A CAAACTTATAT-----ATATATATATATATTTAAATTTTCAGATGTCCGAAGATCTTT 773  
 GhiFAD3-1A CAAACTTATAT-----ATATATAT-----TTAATTTTCAGATGTCCGAAGATCTTT 764  
 \*\*\*\* \* \* \* \* \*\*\*\*\* \* \*\*\*\*\*

GraFAD3-1D ATAATGGTTTGAGCAGCAGGACCAAGTTTCTGAGATTCAAAATCCCATTCCCCTATTTG 840  
 GhiFAD3-1D ATAATAGTTTGAGCAGCAGGACCAAGTTTCTGAGATTCAAAATCCCATTCCCCTATTTG 839  
 GheFAD3-1A ATAATAGTTTGAGCAGCAGGACCAAGTTTCTGAGATTCAAAATCCCATTCCCCTATTTG 833  
 GhiFAD3-1A ATAATAGTTTGAGCAGCAGGACCAAGTTTCTGAGATTCAAAATCCCATTCCCCTATTTG 824  
 \*\*\*\*\*

GraFAD3-1D CATACCCCGTCTATTTGGTGAGAGACATTGATTGAAATGCAAAGACGATTTTAAACAATT 900  
 GhiFAD3-1D CATACCCGTCTATTTGGTGAGAGACATTGATTGAAATGCAAAGACGATTTTAAACAATT 899  
 GheFAD3-1A CATACCCGTCTATTTGGTGAGAGACATTGATTGAAATGCAAAGATGATTTTAAACAATT 893  
 GhiFAD3-1A CATACCCGTCTATTTGGTGAGAGACATTGATTGAAATGCAAAGATGATTTTAAACAATT 884  
 \*\*\*\*\*

GraFAD3-1D AGTCATGATTTAACAAGATTGAAGTAAATAAACATTGGGTAATTTTGGATATGCAGTGG 960  
 GhiFAD3-1D AGTCATGATTTAACAAGATTGAAGTAAATAAACATTGGGTAATTTTGGATATGCAGTGG 959  
 GheFAD3-1A AGTCATGATTTAACAAGTTGAAGTAAATAAACATTGGGTAATTTTGGATATGCAGTGG 953  
 GhiFAD3-1A AGTCATGATTTAACAAGATTGAAGTAAATAAACATTGGGTAATTTTGGATATGCAGTGG 944  
 \*\*\*\*\*

GraFAD3-1D CACAGAAGTCCAGGAAAGACAGGATCTCACTTCAACCCATACAGCAACTTGTGTTGCTCCC 1020  
 GhiFAD3-1D CACAGAAGTCCAGGAAAGACAGGATCTCACTTCAACCCATACAGCAACTTGTGTTGCTCCC 1019  
 GheFAD3-1A CACAGAAGTCCAGGAAAGACAGGATCTCACTTCAACCCATACAGCAACTTGTGTTGCTCCC 1013  
 GhiFAD3-1A CACAGAAGTCCAGGAAAGACAGGATCTCACTTCAACCCATACAGCAACTTGTGTTGCTCCC 1004  
 \*\*\*\*\*

GraFAD3-1D CAAGAACGAAAACATATAATGACATCAACAACCTGTTGGATAGCAATGGTGGTTTTTCCTT 1080  
 GhiFAD3-1D CAAGAACGAAAACATATAATGACATCAACAACCTGTTGGATAGCAATGGTGGTTTTTCCTT 1079  
 GheFAD3-1A CAAGAACGAAAACATATAATGACATCAACAACCTGTTGGATAGCAATGGTGGTTTTTCCTT 1073  
 GhiFAD3-1A CAAGAACGAAAACATATAATGACATCAACAACCTGTTGGATAGCAATG**GTGGTTTTTCCTT** 1064  
 \*\*\*\*\*

-----S1F----->  
 GraFAD3-1D GTGTATTTATCCTTTGTAATCGGTCCATCCATGACATTCAAGCTCTACGGTGTCCCTAC 1140  
 GhiFAD3-1D GTGTATTTATCCTTTGTAATCGGTCCATCCATGACATTCAAGCTCTACGGTGTCCCTAC 1139  
 GheFAD3-1A GTGTATTTATCCTCTGTAATCGGTCCATCCATGACATTCAAGCTCTACGGTGTCCCTAC 1133  
 GhiFAD3-1A **GTGTATTTATCCTCT**GTAATCGGTCCATCCATGACATTCAAGCTCTACGGTGTCCCTAC 1124  
 \*\*\*\*\*

GraFAD3-1D TTGGTATGCCACTT-CTACCAAATTCACAATATATATA---TCTATCTCTGAGTAATGA 1195  
 GhiFAD3-1D TTGGTATGCCACTT-CCACCAAATTCACAATATATATA---TCTATCTCTGAGTAATGA 1194  
 GheFAD3-1A TTGGTATGCCACTTTCTACCAAATTCACAATATATATATATATATATCTCTGAGTAATGA 1193  
 GhiFAD3-1A TTGGTATGCCACTT-CTACCAAATTCACAATATATA-----TATATCTCTGAGTAATGA 1177  
 \*\*\*\*\* \* \*\*\*\*\*

GraFAD3-1D ATATATGATTGTTACCATTTCATTAGATTTTCGTTGGCATGGCTGGATGTGGTGACTTAC 1255  
 GhiFAD3-1D ATATATGATTGTTATCATTTCCATTAGATTTTCGTTGGCATGGCTGGATGTGGTGACTTAC 1254  
 GheFAD3-1A ATATATGATTGTTACCATTTCATTAGATTTTCGTTGGCATGGCTGGATGTGGTGACTTAC 1253  
 GhiFAD3-1A ATATATGATTGTTACCATTTCATTAGATTTTCGTTGGCATGGCTGGATGTGGTGACTTAC 1237  
 \*\*\*\*\*

<-----S41R-----  
 GraFAD3-1D CTTCAACACCACGGATACGAGCAGAAGCTTCCTTGGTATCGTGGCAAGGTAGTAATTACA 1315  
 GhiFAD3-1D CTTCA**CCACCACGGATACGA**GCAGAAGCTTCCTTGGTATCGTGGCAAGGTAGTAATTACA 1314  
 GheFAD3-1A CTTCA**TACCATGGATACGAGCAGAAGCTTCCTTGGTATCGTGGCAAGGTAGTAATTACA** 1313  
 GhiFAD3-1A CTTCA**TACCATGGATACGAGCAGAAGCTTCCTTGGTATCGTGGCAAGGTAGTAATTACA** 1297  
 \*\*\*\*\*

GraFAD3-1D ACCC---CCCTCCATTGCATTTGACACTATCAATGATTTTGTGTTGTGTGACGACTATCAG 1372  
 GhiFAD3-1D ACCC---CCCTCCATTGCATTTGACACTATCAATGATTTTGTGTTGTGTGACGACTATCAG 1371  
 GheFAD3-1A ACCCGCCCTCCATTGCATTTGACACTATCAATGATTTTGTGTTGTGTGACGACTATCAG 1373  
 GhiFAD3-1A ACCCGCCCTCCATTGCATTTGACACTATCAATGATTTTGTGTTGTGTGACGACTATCAG 1357  
 \*\*\*\*\*

|                 |                                                                       |           |
|-----------------|-----------------------------------------------------------------------|-----------|
| GraFAD3-1D      | <u>GAATGGAGTTACCTGAGAGGAGGGCTTACAACAATAGACCGTGATTATGGTATATTCAAT</u>   | 1432      |
| GhiFAD3-1D      | <u>GAATGGAGTTACCTGAGAGGAGGGCTTACAACAATAGACCGTGATTATGGTATATTCAAT</u>   | 1431      |
| GheFAD3-1A      | <u>GAATGGAGTTACCTGAGAGGAGGGCTTACAACAATAGACCGTGATTATGGTATATTCAAT</u>   | 1433      |
| GhiFAD3-1A      | <u>GAATGGAGTTACCTGAGAGGAGGGCTTACAACAATAGACCGTGATTATGGTATATTCAAT</u>   | 1417      |
| *****           |                                                                       |           |
| GraFAD3-1D      | <u>GGTATCCACCATGACATTGGCACCCATGTCATTCATCATCTCTTTCCTCAGATCCCCCAT</u>   | 1492      |
| GhiFAD3-1D      | <u>GGTATCCACCATGACATTGGCACCCATGTCATTCATCATCTCTTTCCTCAGATCCCCCAT</u>   | 1491      |
| GheFAD3-1A      | <u>GGTATCCACCATGACATAGGCACCCATGTCATTCATCATCTCTTTCCTCAGATCCCCCAT</u>   | 1493      |
| GhiFAD3-1A      | <u>GGTATCCACCATGACATTGGCACCCATGTCATTCATCATCTCTTTCCTCAGATCCCCCAT</u>   | 1477      |
| *****           |                                                                       |           |
| GraFAD3-1D      | <u>TATCACTTAGTCGAAGCTGTAAGTATTCTCAATTTTTGGGTTAATTTTAGATTACTCCTC</u>   | 1552      |
| GhiFAD3-1D      | <u>TATCACTTAGTCGAAGCTGTAAGTATTCTCAATTTTTGGGTTAATTTTAGATTACTCCTC</u>   | 1551      |
| GheFAD3-1A      | <u>TATCACTTAGTCGAAGCTGTAAGTATTCTCAATTTTTGGGTTAATTTTAGATTACTCCTC</u>   | 1553      |
| GhiFAD3-1A      | <u>TATCACTTAGTCGAAGCTGTAAGTATTCTCAATTTTTGGGTTAATTTTAGATTACTCCTC</u>   | 1537      |
| *****           |                                                                       |           |
| GraFAD3-1D      | <u>AAAATGTTTCCATCACCTAGCAGTAAGCTTGA AACGGGGTGTGGTGCAGACAAAAGCAG</u>   | 1612      |
| GhiFAD3-1D      | <u>AAAATGTTTCCATCACCTAGCAGTAAGCTTGA AACGGGGTGTGGTGCAGACAAAAGCAG</u>   | 1611      |
| GheFAD3-1A      | <u>AAAATGTTTCCATCACCTAGCAGTAAGCTTGA AACGGGGTGTGGTGCAGACAAAAGCAG</u>   | 1613      |
| GhiFAD3-1A      | <u>AAAATGTTTCCATCACCTAGCAGTAAGCTTGA AACGGGGTGTGGTGCAGACAAAAGCAG</u>   | 1597      |
| *****           |                                                                       |           |
| GraFAD3-1D      | <u>CGAAACCGGTGATAGGAAAATACTACCGGGAGCCGAAGAAATCAGGGCCGATTCCGTTTC</u>   | 1672      |
| GhiFAD3-1D      | <u>CGAAACCGGTGATAGGAAAATACTACCGGGAGCCGAAGAAATCAGGGCCGATTCCGTTTC</u>   | 1671      |
| GheFAD3-1A      | <u>CGAAACCGGTGATAGGAAAATACTACCGGGAGCCGAAGAAATCAGGGCCGATTCCGTTTC</u>   | 1673      |
| GhiFAD3-1A      | <u>CGAAACCGGTGATAGGAAAATACTACCGGGAGCCGAAGAAATCAGGGCCGATTCCGTTTC</u>   | 1657      |
| *****           |                                                                       |           |
| GraFAD3-1D      | <u>ACTTAATAGAGAATCTAGTGTGCGAGCATGAAACAAGATCATTACGTGAGCAACAGCGGAG</u>  | 1732      |
| GhiFAD3-1D      | <u>ACTTAATAGAGAATCTAGTGTGCGAGCATGAAACAAGATCATTACGTGAGCAACAGCGGAG</u>  | 1731      |
| GheFAD3-1A      | <u>ACTTAATAGAGAATCTAGTGTGCGAGCATGAAACAAGATCATTACGTGAGCAACAGCGGAG</u>  | 1733      |
| GhiFAD3-1A      | <u>ACTTAATAGAGAATCTAGTGTGCGAGCATGAAACAAGATCATTACGTGAGCAACAGCGGAG</u>  | 1717      |
| *****           |                                                                       |           |
| <-----S2R-----> |                                                                       |           |
| GraFAD3-1D      | <u>AGATAGTATTTTATCAGACGGATCCCAACCTGTTTTTCGCCTCCCAAATCCGCATGAGCCA</u>  | 1792      |
| GhiFAD3-1D      | <u>AGATAGTATTTTATCAGACGGATCCCAACCTGTTTTTCGCCTCCCAAATCCGCATGAGCCA</u>  | 1791      |
| GheFAD3-1A      | <u>AGATTGTATTTTATCAGACGGATCCCAACCTGTTTTTCCTCCTCCCAAATCCGCATGAGCCA</u> | 1793      |
| GhiFAD3-1A      | <u>AGATTGTATTTTATCAGACGGATCCCAACCTGTTTTCTCCTCCCAAATCCGCATGAGCCA</u>   | 1777      |
| ****            |                                                                       |           |
| GraFAD3-1D      | <u>TTTTATTTAGAGATCATAGAGCTGAAACAAACAAGGGCCTTCATTCTTTTCGGT</u>         | C10R 1846 |
| GhiFAD3-1D      | <u>TTTTATTTAGAGCATGCGGG</u>                                           | C12R 1811 |
| GheFAD3-1A      | <u>TTTTATTTAGAGATCATAGAGCTGAAACAAACAAGGGCCTTCATTCTTTTCGGT</u>         | C10R 1847 |
| GhiFAD3-1A      | <u>TTTTATTTAGAGCATGCGGG</u>                                           | C12R 1797 |
| *****           |                                                                       |           |
