# Supplementary material for: Genome-wide analysis of the omega-3 fatty acid desaturase gene family in Gossypium
Source: PubMed Central journal article supplement (PMC4245742; doi:10.1186/s12870-014-0312-5), 2014-11-18
Supplement: 12870_2014_312_MOESM9_ESM.pdf [file 12870_2014_312_MOESM9_ESM.pdf]

GheFAD3-2.1A C26F AAGGTTTCGAAAGGAGTGGAGATAAAGCAACCATTGGTCACCTATCTCATCCTAGATACAT 60  
GhiFAD3-2.1A -----  
GraFAD3-2.1D C26F AAGGTTTCGAAAGGAGTGGAGATAAAGCAACCATTGGTCACCTATCTCATCCTAGATACAT  
GhiFAD3-2.1D -----  
GheFAD3-2.2A C26F AAGGTTTCGAAAGGAGTGGAGATAAAGCAACCATTGGTCACCTATCTCATCCTAGATACAT 60  
GhiFAD3-2.2A -----

-----S44F----->

GheFAD3-2.1A GATTTGAAACAATGGAGTTGAAAAGGGAGTATGTTAATGGAATGAATGAGCAAGGTGATT 120  
GhiFAD3-2.1A C29F AAAGAGCTCATGGAGTTGAAAAGGGAGTATGTTAATGGAATGAATGAGCAAGGTGATT 58  
GraFAD3-2.1D GATTTGAAACAATGGAGTTGAAAAGGGAGTATGCCAATGGAATGAATGAGCAAGGTGATT 120  
GhiFAD3-2.1D C29F AAAGAGCTCATGGAGTTGAAAAGGGAGTATGCCAATGGAATGAATGAGCAAGGTGATT 58  
GheFAD3-2.2A GATTTGAAACAATGGAGTTGAAAAGGGAGTATGTTAATGGAATGAATGAGCAAGGTGATT 120  
GhiFAD3-2.2A C29F AAAGAGCTCATGGAGTTGAAAAGGGAGTATGTTAATGGAATGAATGAGCAAGGTGATT 58  
\*\* \*\*\*\*\*

-----S9F----->

GheFAD3-2.1A TTGATCCGAGTTCACCTCCTCCATTCGGGATGCGGATATCCGAGCTGCCATACCGAAGC 180  
GhiFAD3-2.1A TTGATCCGAGTTCACCTCCTCCATTCGGGATGCGGATATCCGAGCTGCCATACCGAAGC 118  
GraFAD3-2.1D TTGATCCGAGTTCACCTCCTCCATTCGGGATGCGGATATCCGAGCTGCCATACCGAAGC 180  
GhiFAD3-2.1D TTGATCCGAGTTCACCTCCTCCATTCGGGATGCGGATATCCGAGCTGCCATACCGAAGC 118  
GheFAD3-2.2A TTGATCCGAGTTCACCTCCTCCATTCGGGATGCGGATATCCGAGCTGCCATACCGAAGC 180  
GhiFAD3-2.2A TTGATCCGAGTTCACCTCCTCCATTCGGGATGCGGATATCCGAGCTGCCATACCGAAGC 118  
\*\*\*\*\*

GheFAD3-2.1A AGTGTGGATCAAGAATCCATGGAGGTCATGAGTTATGTTTTAGGGATGTCAGTGTGG 240  
GhiFAD3-2.1A AGTGTGGATCAAGAATCCATGGAGGTCATGAGTTATGTTTTAGGGATGTCAGTGTGG 178  
GraFAD3-2.1D AGTGTGGATCAAGAATCCATGGAGGTCATGAGTTATGTTTTAGGGATGTCAGTGTGG 240  
GhiFAD3-2.1D AGTGTGGATCAAGAATCCATGGAGGTCATGAGTTATGTTTTAGGGATGTCAGTGTGG 178  
GheFAD3-2.2A AGTGTGGATCAAGAATCCATGGAGGTCATGAGTTATGTTTTAGGGATGTCAGTGTGG 240  
GhiFAD3-2.2A AGTGTGGATCAAGAATCCATGGAGGTCATGAGTTATGTTTTAGGGATGTCAGTGTGG 178  
\*\*\*\*\*

GheFAD3-2.1A TTTTTGCATTAGCAGCAGCTGCAGTCTACTGTAATAATGGCTGTTTTGGCCAATCTACT 300  
GhiFAD3-2.1A TTTTTGCATTAGCAGCAGCTGCAGTCTACTGCAATAATGGCTGTTTTGGCCAATCTACT 238  
GraFAD3-2.1D TTTTTGCATTAGCAGCAGCTGCAGTCTACTGCAATAGTTGGTTGTTTTGGCCAATCTACT 300  
GhiFAD3-2.1D TTTTTGCATTAGCAGCAGCTGCAGTCTACTGCAATAGTTGGTTGTTTTGGCCAATCTACT 238  
GheFAD3-2.2A TTTTTCTTTAGCAGCAGCTGCAGTCTACTGCAATAGT TAGTTGTTTTGGCCAATCTACT 300  
GhiFAD3-2.2A TTTTTCTTTAGCAGCAGCTGCAGTCTACTGCAATAGT TAGTTGTTTTGGCCAATCTACT 238  
\*\*\*\*\*

GheFAD3-2.1A GGTTTGCCCAAGGAACCATGTTTTGGGCTGTCTTTGTCCTTGACATGATTGGTAATAGT 360  
GhiFAD3-2.1A GGTTTGCCCAAGGAACCATGTTTTGGGCTGTCTTTGTCCTTGACATGATTGGTAATAGT 298  
GraFAD3-2.1D GGTTTGCCCAAGGAACCATGTTTTGGGCTGTCTTTGTCCTTGACATGATTGGTAATAGT 360  
GhiFAD3-2.1D GGTTTGCCCAAGGAACCATGTTTTGGGCTGTCTTTGTCCTTGACATGATTGGTAATAGT 298  
GheFAD3-2.2A GGTTTGCCCAAGGAACCATGTTTTGGGCTGTCTTTGTCCTTGACATGATTGGTAATAGT 360  
GhiFAD3-2.2A GGTTTGCCCAAGGAACCATGTTTTGGGCTGTCTTTGTCCTTGACATGATTGGTAATAGT 298  
\*\*\*\*\*

GheFAD3-2.1A ACACCTTCAATTTCCCTTTTCTTGTGTTTTAGTATAACTCTTTATCTTAGTTTTGGATTGCA 420  
GhiFAD3-2.1A ACACCTTCAATTTCCCTTTTCTTGTGTTTTAGTATAACTCTTTATCTTAGTTTTGGATTGCA 358  
GraFAD3-2.1D GCACCTTCAATTTCCCTTTTCTTGTGTTTTAGTATAACTCTTTATCTTAGTTTTGGATTGCA 420  
GhiFAD3-2.1D GCACCTTCAATTTCCCTTTTCTTGTGTTTTAGTATAACTCTTTATCTTAGTTTTGGATTGCA 358  
GheFAD3-2.2A ACACCTTCAATTTCCCTTTTCTTGTGTTTTAATATAACTCTTTATCTTAGTTTTGGATTGCA 420  
GhiFAD3-2.2A ACACCTTCAATTTCCCTTTTCTTGTGTTTTAATATAACTCTTTATCTTAGTTTTGGATTGCA 358  
\*\*\*\*\*

GheFAD3-2.1A GTGGCCATGGAAGCTTTTCAGACAATGCTATTTGAATAGTGTGGTGGGACATATCTTAC 480  
GhiFAD3-2.1A GTGGCCATGGAAGCTTTTCAGACAATGCTATTTGAATAGTGTGGTGGGACATATCTTAC 418  
GraFAD3-2.1D GTGGCCATGGAAGCTTTTCAGACAATGCTATTTGAATAGTGTGGTGGGACATATCTTAC 480  
GhiFAD3-2.1D GTGGCCATGGAAGCTTTTCAGACAATGCTATTTGAATAGTGTGGTGGGACATATCTTAC 418  
GheFAD3-2.2A GTGGCCATGGAAGCTTTTCAGACAATGCTATTTGAATAGTGTGGTGGGACATATCTTAC 480  
GhiFAD3-2.2A GTGGCCATGGAAGCTTTTCAGACAATGCTATTTGAATAGTGTGGTGGGACATATCTTAC 418  
\*\*\*\*\*

GheFAD3-2.1A ATTCTTCAGTTCCTGTTTCCTTACCATGGATGGTGAGTTCATCAGGTAAATATTTGTTCT 540  
GhiFAD3-2.1A ATTCTTCAGTTCCTGTTTCCTTACCATGGATGGTGAGTTCATCAGGTAAATATTTGTTCT 478  
GraFAD3-2.1D ATTCTTCATTTCTTGTTCCTTACCATGGATGGTAAGTTCATCAGGTAAATATTTGTTCT 540  
GhiFAD3-2.1D ATTCTTCATTTCTTGTTCCTTACCATGGATGGTAAGTTCATCAGGTAAATATTTGTTCT 478  
GheFAD3-2.2A ATTCTTCATTTCTTGTTCCTTACCATGGATGGTAAGTTCATCAGGTAAATATTTGTTCT 540  
GhiFAD3-2.2A ATTCTTCATTTCTTGTTCCTTACCATGGATGGTAAGTTCATCAGGTAAATATTTGTTCT 478  
\*\*\*\*\*

GheFAD3-2.1A TTATTTTGTATGCTTGCAACTACATAACAGAATCTGAAAATCTTACAGGAGAATAAGCCA 600  
GhiFAD3-2.1A TTATTTTGTATGCTTGCAACTACATAACAGAATCTGAAAATCTTACAGGAGAATAAGCCA 538  
GraFAD3-2.1D TTATTTTGTATGCTTGCAACTACATAACAGAATCTGAAAATCTTACAGGAGAATAAGCCA 600  
GhiFAD3-2.1D TTATTTTGTATGCTTGCAACTACATAACAGAATCTGAAAATCTTACAGGAGAATAAGCCA 538  
GheFAD3-2.2A TTATTTTGTATGATTGCAACTACATAACATAATCTGAAAATCTTACAGGAGAATAAGCCA 600  
GhiFAD3-2.2A TTATTTTGTATGATTGCAACTACATAACATAATCTGAAAATCTTACAGGAGAATAAGCCA 538

\*\*\*\*\*  
-----S5F-----> <---

GheFAD3-2.1A TAGAACTCATCATCAGAACCACGGAAATGTCGAAAATGATGAGTCATGGGTCCGGTACA 660  
GhiFAD3-2.1A TAGAACTCATCATCAEAACCACGGAAATGTCGAAAATGATGAGTCATGGGTCCGGTAAA 598  
GraFAD3-2.1D CAGAATCATCATCAGAACCACGGAAATGTCGAAAAGGATGAGTCATGGGTCCGGTACA 660  
GhiFAD3-2.1D CAGAATCATCATCAGAACCACGGAAATGTCGAAAAGGATGAGTCATGGGTCCGGTACA 598  
GheFAD3-2.2A TAGAACTCATTATCAGAACCACGGAAATGTCGAAAAGGAGAGTCATGGGTCCGGTACA 660  
GhiFAD3-2.2A TAGAACTCATCATCAGAACCACGGAAATGTCGAAAAGGATGAGTCATGGGTCCGGTACA 598

\*\*\*\*\* \*\* \*\*\*\*\* \*

GheFAD3-2.1A ACATTTTCGACCTTATTTTCTTATAATTCATCCATGCTATATATATCAAGTTGCAGACT 720  
GhiFAD3-2.1A ACATTTTCGACCTTATTTTCTTATAATTCATCCATGCTATATATATCAAGTTGCAGACT 658  
GraFAD3-2.1D ACATTTTCGACCTTATTTTCTTATAATTCATCCATGCTATATATATCAAGTTGCAGACT 720  
GhiFAD3-2.1D ACATTTTCGACCTTATTTTCTTATAATTCATCCATGCTATATATATCAAGTTGCAGACT 658  
GheFAD3-2.2A ACATTTTCGACCTTATTTTCTTATAATTCATCCATGCTATATATATCAAGTTGCAGACT 720  
GhiFAD3-2.2A ACATTTTCGACCTTATTTTCTTATAATTCATCCATGCTATATATATCAAGTTGCAGACT 658

\*\*\*\*\* \*\* \*\*\*\*\* \*

-----S10R-----

GheFAD3-2.1A AACCCTTCATGCTTTTGGTTTTAATCTCAGTTGCCTGAGAATATTTACAAGAACTCGA 780  
GhiFAD3-2.1A AACCCTTCATGCTTTTGGTTTTAATCTCAGTTGCCTGAGAATATTTACAAGAACTCGA 718  
GraFAD3-2.1D AACCCTTCATACTTTTGGTTTTAATCTCAGATGCCTGAGAATATTTACAAGAACTCGA 780  
GhiFAD3-2.1D AACCCTTCATACTTTTGGTTTTAATCTCAGATGCCTGAGAATATTTACAAGAACTCGA 718  
GheFAD3-2.2A AACCCTTCATACTTTTGGTTTTAATCTCAGTTGCCTGAGAATATTTACAAGAACTCGA 780  
GhiFAD3-2.2A AACCCTTCATACTTTTGGTTTTAATCTCAGTTGCCTGAGAATATTTACAAGAACTCGA 718

\*\*\*\*\* \*\* \*\*\*\*\* \*

GheFAD3-2.1A CACCAGTACGCGATTACTGCGATTACCCGTCCTTTCCCTATTTGCATTCCCGTGTA 840  
GhiFAD3-2.1A CACCAGTACGCGATTACTGCGATTACCCGTCCTTTCCCTATTTGCATTCCCGTGTA 778  
GraFAD3-2.1D CACCAGTACGCGATTACTGCGATTACCCGTCCTTTCCCTATTTGCATTCCCGTGTA 840  
GhiFAD3-2.1D CACCAGTACGCGATTACTGCGATTACCCGTCCTTTCCCTATTTGCATTCCCGTGTA 778  
GheFAD3-2.2A CACCAGTACGCGATTACTGCGATTACCCGTCCTTTCCCTATTTGCATTCCCGTGTA 840  
GhiFAD3-2.2A CACCAGTACGCCATTACTGCGATTACCCGTCCTTTCCCTATTTGCAATTCCCATGTA 778

\*\*\*\*\* \*\* \*\*\*\*\* \*

GheFAD3-2.1A TTTGGTGAGAAAGCTTGTTTTGTTTTAGTCGACAAAAGATTAACATAATGGCTGGTAAG 900  
GhiFAD3-2.1A TTTGGTGAGAAAGCTTGTTTTGTTTTAGTCGACAAAAGATTAACATAATGGCTGGTAAG 838  
GraFAD3-2.1D TTTGGTGGGAAAGCTTGTTTTGTTTTAGTCGACAAAAGATTAACATAATGGCTAGTAAG 900  
GhiFAD3-2.1D TTTGGTGGGAAAGCTTGTTTTGTTTTAGTCGACAAAAGATTAACATAATGGCTAGTAAG 838  
GheFAD3-2.2A TTTGGTGAGAAAGCTTGTTTTGTTTT-----GGCTAGTAAG 875  
GhiFAD3-2.2A TTTGGTGAGAAAGCTTGTTTTGTTTT-----GGCTAGTAAG 813

\*\*\*\*\* \*\*\*\*\* \*\* \*\*\*\*\* \*

GheFAD3-2.1A GAGTTAAATTTGGCTATCTTTTGTTCATTACAGTGGTATAGAAGCCAGGCAAAGAAG 960  
GhiFAD3-2.1A GAGTTAAATTTGGCTATCTTTTGTTCATTACAGTGGTATAGAAGCCAGGCAAAGAAG 898  
GraFAD3-2.1D GAGTTAAATTTGGCTATCTTTTGTTCATTACAGTGGTATAGAAGCCAGGCAAAGAAG 960  
GhiFAD3-2.1D GAGTTAAATTTGGCTATCTTTTGTTCATTACAGTGGTATAGAAGCCAGGCAAAGAAG 898  
GheFAD3-2.2A GAGTTAAATTTGGCTAT-TTTTGTTTTTTCATTACAGTGGTATAGAAGCCAGGCAAAGAAG 934  
GhiFAD3-2.2A GAGTTAAATTTGGCTAT-TTTTGTTTTTTCATTACAGTGGTATAGAAGCCAGGCAAAGAAG 872

\*\*\*\*\* \*\* \*\*\*\*\* \*

<-----S45R-----

GheFAD3-2.1A GATCTCATTTCAACCCTTACAGCAACTGTTTAGCCCCAAGAGAGGAAACTTGTGATGA 1020  
GhiFAD3-2.1A GATCTCATTTCAACCCTTACAGCAACTGTTTAGCCCCAAGAGAGGAAACTTGTGATGA 958  
GraFAD3-2.1D GATCTCATTTCAATCCTTACAGCAACTGTTTAGCCCCAAGAGAGGAAACTTGTGATGA 1020  
GhiFAD3-2.1D GATCTCATTTCAATCCTTACAGCAACTGTTTAGCCCCAAGAGAGGAAACTTGTGATGA 958  
GheFAD3-2.2A GATCTCATTTCAACCCTTACAGCAACTGTTTAGCCCCAAGAGAGGAAACTTGTGATGA 994  
GhiFAD3-2.2A GATCTCATTTCAACCCTTACAGCAACTGTTTAGCCCCAAGAGAGGAAACTTGTGATGA 932

\*\*\*\*\* \*\* \*\*\*\*\* \*

GheFAD3-2.1A TATCCACTGCCTGTTGGTCTACAATGGCTATTATACTTGCCTACGTATCCTTTACAGTTG 1080  
GhiFAD3-2.1A TATCCACTGCCTGTTGGTCTACAATGGCTATTATACTTGCCTACGTATCCTTTACAGTTG 1018  
GraFAD3-2.1D TATCCACTGCCTGTTGGTCTACAATGGCTATTATACTTGCCTACGTATCCTTTACAGTTG 1080  
GhiFAD3-2.1D TATCCACTGCCTGTTGGTCTACAATGGCTATTATACTTGCCTACGTATCCTTTACAGTTG 1018  
GheFAD3-2.2A TATCCAATGCCTGTTGGTCTCCAATGGTTATTATACTTGCCTACGTATCCTTTACAGTTG 1054  
GhiFAD3-2.2A TATCCAATGCCTGTTGGTCTCCAATGGTTATTATACTTGCCTACGTATCCTTTACAGTTG 992

\*\*\*\*\* \*\* \*\*\*\*\* \*

GheFAD3-2.1A GTCCATCCCACATGTTTAAGCTCTATGGCATTCCCTACTTGGTACGTCAAGCTGTGTGAT 1140  
GhiFAD3-2.1A GTCCATCCCACATGTTTAAGCTCTATGGCATTCCCTACTTGGTACGTCAAGCTGTGTGAT 1078  
GraFAD3-2.1D GTCCATCCCACATGTTTAAGCTCTATGGCATTCCCTACTTGGTACGTCAAGCTGTGTGAG 1140  
GhiFAD3-2.1D GTCCATCCCACATGTTTAAGCTCTATGGCATTCCCTACTTGGTACGTCAAGCTGTGTGAG 1078  
GheFAD3-2.2A GTCCATCCCACGTGTTTAAGCTCTATGGCATTCCCTATTGGTACGTCAAGCTGTGTGAG 1114  
GhiFAD3-2.2A GTCCATCCCACGTGTTTAAGCTCTATGGCATTCCCTATTGGTACGTCAAGCTGTGTGAG 1052  
\*\*\*\*\*

GheFAD3-2.1A TCACTTGCGCT-AAGTTTCGATCCATCAAGCTGAGCCATTTTATTCTGGTTTCGTAGATT 1199  
GhiFAD3-2.1A TCACTTGCGCT-AAGTTTCGATCCATCAAGCTGAGCCATTTTATTCTGGTTTCGTAGATT 1137  
GraFAD3-2.1D TCACTTGCGCT-AAGTTTCGATCCATCAAGCTGAGCCATTTTATTCTGGTTTCGTAGATT 1199  
GhiFAD3-2.1D TCACTTGCGCT-AAGTTTCGATCCATCAAGCTGAGCCATTTTATTCTGGTTTCGTAGATT 1137  
GheFAD3-2.2A TCACTTGCGCTTAAGTTTCGATCGATCAAGCTGAGCCATTTTATTCTGGTTTCGTAGATT 1174  
GhiFAD3-2.2A TCACTTGCGCTTAAGTTTCGATCGATCAAGCTGAGCCATTTTATTCTGGTTTCGTAGATT 1112  
\*\*\*\*\*

GheFAD3-2.1A TTCGTGATATGGCTAGATTTAGTGACTTACCTACATCACCATGGCCATGAGCAGAAACTA 1259  
GhiFAD3-2.1A TTCGTGATATGGCTAGATTTAGTGACTTACCTACATCACCATGGCCATGAGCAGAAACTA 1197  
GraFAD3-2.1D TTCGTGATATGGCTAGATTTAGTAACTTACCTACATCACCATGGCCATGAGCAGAAACTA 1259  
GhiFAD3-2.1D TTCGTGATATGGCTAGATTTAGTAACTTACCTACATCACCATGGCCATGAGCAGAAACTA 1197  
GheFAD3-2.2A TTCGTGGTATGGCTAGATTTATTGACTTATCTACATCACCATGGCCATGAGCAGAAACTA 1234  
GhiFAD3-2.2A TTCGTGATATGGCTAGATTTATTGACTTATCTACATCACCATGGCCATGAGCAGAAACTA 1172  
\*\*\*\*\*

GheFAD3-2.1A CCTTGGTACCGTGGCAAGGTA-CCTACAATTTAACTTTGTATGTACGCATTTGAGAGTAA 1318  
GhiFAD3-2.1A CCTTGGTACCGTGGCAAGGTA-CCTACAATTTAACTTTGTATGTACGCATTTGAGAGTAA 1256  
GraFAD3-2.1D CCTTGGTACCGTGGCAAGGTAACCTACAATTTAACTTTGTATGTACGCATTTGAGAGTAA 1319  
GhiFAD3-2.1D CCTTGGTACCGTGGCAAGGTAACCTACAATTTAACTTTGTATGTACGCATTTGAGAGTAA 1257  
GheFAD3-2.2A CCTTGGTACCGTGGCAAGGTAACCTACAATTTAACTTTGTATGTAGGCATTTAAGAGTAA 1294  
GhiFAD3-2.2A CCTTGGTACCGTGGCAAGGTAACCTACAATTTAACTTTGTATGTAGGCATTTAAGAGTAA 1232  
\*\*\*\*\*

GheFAD3-2.1A AAAGTTGTTCAAACCTTGAGAGGTTT-GTTCATTTACATAACAGGAATGGAGTTATCTGAG 1377  
GhiFAD3-2.1A AAAGTTGTTCAAACCTTGAGAGGTTT-GTTCATTTACATGACAGGAATGGAGTTATCTGAG 1315  
GraFAD3-2.1D AAAATTTGTTCC--ACTTGAGAGGTTTGTTCATTTACATGACAGGAATGGAGTTATCTGAG 1377  
GhiFAD3-2.1D AAAATTTGTTCC--ACTTGAGAGGTTTGTTCATTTACATGACAGGAATGGAGTTATCTGAG 1315  
GheFAD3-2.2A AAAATTTGTTCAAACCTTGAGAGGTTTGTTCATTTACATGACAGGAATGGAGTTATCTGAG 1354  
GhiFAD3-2.2A AAAATTTGTTCAAACCTTGAGAGGTTTGTTCATTTACATGACAGGAATGGAGTTATCTGAG 1292  
\*\*\* \*\*\*\*\*

GheFAD3-2.1A AGGAGGGCTTACAACAGTGGATCGTGATTATGGTTTATTCAATAATATCCACCATGACAT 1437  
GhiFAD3-2.1A AGGAGGGCTTACAACAGTGGATCGTGATTATGGTTTATTCAATAATATCCACCATGACAT 1375  
GraFAD3-2.1D AGGAGGGCTTACAACAGTGGATCGTGATTATGGTTTATTCAATAATATCCACCATGACAT 1437  
GhiFAD3-2.1D AGGAGGGCTTACAACAGTGGATCGTGATTATGGTTTATTCAATAATATCCACCATGACAT 1375  
GheFAD3-2.2A AGGAGGGCTTACAACAGTGGATCTTGATTATGGTTTATTCAATAATATCCACCATGACAT 1414  
GhiFAD3-2.2A AGGAGGGCTTACAACAGTGGATCTTGATTATGGTTTATTCAATAATATCCACCATGACAT 1352  
\*\*\*\*\*

GheFAD3-2.1A TGGCACACATGTCATCCATCATCTCTCCCTCAAATCCCTCATTATCACTTAGTGGAAAGC 1497  
GhiFAD3-2.1A TGGCACACATGTCATCCATCATCTCTCCCTCAAATCCCTCATTATCACTTAGTGGAAAGC 1435  
GraFAD3-2.1D TGGCACACATGTCATCCATCATCTCTCCCTCAAATCCCTCATTATCACTTAGTGGAAAGC 1497  
GhiFAD3-2.1D TGGCACACATGTCATCCATCATCTCTCCCTCAAATCCCTCATTATCACTTAGTGGAAAGC 1435  
GheFAD3-2.2A TGGCACACATGTCATCCATCATCTCTCCCTCAAATCCCTCATTATCACTTAGTGGAAAGC 1474  
GhiFAD3-2.2A TGGCACACATGTCATCCATCATCTCTCCCTCAAATCCCTCATTATCACTTAGTGGAAAGC 1412  
\*\*\*\*\*

GheFAD3-2.1A TGTAAGCAAAATATTCCTTTAGAAACAATTAACCGATTGATTTCAAGATAAAATGAAG 1557  
GhiFAD3-2.1A TGTAAGCAAAATATTCCTTTAGAAACAATTAACCGATTGATTTCAAGATAAAATGAAG 1495  
GraFAD3-2.1D TGTATGTAGAGTATTCCTTTAGAAACAATTAACCGATTGATTTCAAGATAAAATGAAG 1557  
GhiFAD3-2.1D TGTATGTAGAGTATTCCTTTAGAAACAATTAACCGATTGATTTCAAGATAAAATGAAG 1495  
GheFAD3-2.2A TGTATGTAAAAATATTCCTTTAGAAACAATTAACCGATTGATTTCAAGATAAAATGAAG 1534  
GhiFAD3-2.2A TGTATGTAAAAATATTCCTTTAGAAACAATTAACCGATTGATTTCAAGATAAAATGAAG 1472  
\*\*\*\* \*

GheFAD3-2.1A G--GTGTTTTCTGGGTTTTCGAGACTAAAGCGGCAAACCGGTGATAGGAAAATTCCTACC 1615  
GhiFAD3-2.1A G--GTGTTTTCTGGGTTTTCGAGACTAAAGCGGCAAACCGGTGATAGGAAAATTCCTACC 1553  
GraFAD3-2.1D G--GTGTTTTCTGGGTTTTCGAGACTAAAGCGGCAAACCGGTGATAGGAAAATTCCTATT 1615  
GhiFAD3-2.1D G--GTGTTTTCTGGGTTTTCGAGACTAAAGCGGCAAACCGGTGATAGGAAAATTCCTATT 1553  
GheFAD3-2.2A GCCGTGTTTTCTGGGTTTTCGAGACTAAAGCGGCAAACCGGTGATAGGAAAATTCCTATC 1594  
GhiFAD3-2.2A GCCGTGTTTTCTGGGTTTTCGAGACTAAAGCGGCAAACCGGTGATAGGAAAATTCCTATC 1532  
\* \*\*\*\*\*

GheFAD3-2.1A GGGAGCCGAAGAAATCAGGGGCTGTTCCATTTCATTGATCAATAATTTAATCACAAGCC 1675  
 GhiFAD3-2.1A GGGAGCCGAAGAAATCAGGGGCTGTTCCATTTCATTGATCAATAATTTAATCACAAGCC 1613  
 GraFAD3-2.1D GGGAGCCGAAGAAATCAGGTGCTGTTCCATTTCATTGATCAAGAATTTAATCACAAGCC 1675  
 GhiFAD3-2.1D GGGAGCCGAAGAAATCAGGTGCTGTTCCATTTCATTGATCAAGAATTTAATCACAAGCC 1613  
 GheFAD3-2.2A GGGAGCCGAAGAAATCAGGGGCTGTTCCATTTCATTGATCAATAATTTAATCACAAGCC 1654  
 GhiFAD3-2.2A GGGAGCCGAAGAAATCAGGGGCTGTTCCATTTCATTGATCAATAATTTAATCACAAGCC 1592

\*\*\*\*\*

<---S6R--

GheFAD3-2.1A TCGCACAAGATCATTACGTCAGCAATAGTGGAGATATA--GTGTTTTCATCGGACTGATCT 1733  
 GhiFAD3-2.1A TCGCACAAGATCATTACGTCAGCAATAGTGGAGATATA--GTGTTTTCATCGGACTGATCT 1671  
 GraFAD3-2.1D TCGCACAAGATCATTACGTCAGCAATAGTGGAGATATA--GTGTTTTCATCGGACTGATCT 1733  
 GhiFAD3-2.1D TCGCACAAGATCATTACGTCAGCAATAGTGGAGATATA--GTGTTTTCATCGGACTGATCT 1671  
 GheFAD3-2.2A TCGGACAAGATCATTACGTCAGCAATAGTGGAGATATA TAGTGTTCATCAGACTGATCT 1714  
 GhiFAD3-2.2A TCGGACAAGATCATTACGTCAGCAATAGTGGAGATATA TAGTGTTCATCAGACTGATCT 1652

\*\*\*\*\*

GheFAD3-2.1A AAACCTGTTTAAAGTTGCTTTCCCTTGCCAAATCTGAATGATACAATAACTAAGATTAAGG 1793  
 GhiFAD3-2.1A AAACCTGTTTAAAGTTGCTTTCCCTTGCCAAATCTGAATGATACAATAACTAAGATGCATG 1731  
 GraFAD3-2.1D AAACCTGTTTAAAGTTGCTTTCCCTTGCCAAATCTGAATGATACAATAACTAAGATTAAGG 1793  
 GhiFAD3-2.1D AAACCTGTTTAAAGTTGCTTTCCCTTGCCAAATCTGAATGATACAATAACTAAGATGCATG 1731  
 GheFAD3-2.2A AAACCTGTTTAAAGTTGCTTTCCCTTGCCAAATCTGAATGATACAATAACTAAGATTAAGG 1774  
 GhiFAD3-2.2A AAACCTGTTTAAAGTTGCTTTCCCTTGCCAAATCTGAATGATACAATAACTAAGATGCATG 1712

\*\*\*\*\*

GheFAD3-2.1A GCCATAATTTGTTTCAT C28R 1809  
 GhiFAD3-2.1A CCC----- C31R 1735  
 GraFAD3-2.1D GCCATAATTTGTTTCAT C28R 1809  
 GhiFAD3-2.1D CCC----- C31R 1735  
 GheFAD3-2.2A GCCATAATTTGTTTCAT C28R 1790  
 GhiFAD3-2.2A CCC----- C31R 1716

\*\*
