# Supplementary material for: Genome-wide analysis of the omega-3 fatty acid desaturase gene family in Gossypium
Source: PubMed Central journal article supplement (PMC4245742; doi:10.1186/s12870-014-0312-5), 2014-11-18
Supplement: 12870_2014_312_MOESM10_ESM.pdf [file 12870_2014_312_MOESM10_ESM.pdf]

GheFAD78-1A CGGTGGTTGAGTTTTTCTTTTTACCTGAGTCTCAATGGCGGGTTTCATTATATCTGGTT 60  
GhiFAD78-1A C27F GGTGGTTGAGTTTTTCTTTTTACCTGAGTCTCAATGGCGGGTTTCATTATATCTGGTT 59  
GraFAD78-1D C13F CGGTGGTTGAGTTTTTCTTTTTATCAGAGTCTCAATGGCGGGTTTCGTTATATCTGGTT 60  
GhiFAD78-1D C15F CCCGAGCTCTTTTTATCAGAGTCTCAATGGCGGGTTTCGTTATATCTGGTT 52  
\*\*\*\*\* \* \*\*\*\*\*

GheFAD78-1A TAAAGCCTCTTCCTTGTATCTACGATAGACCCGTCGCTGGCGTTATCTCGAGGAGTTCTT 120  
GhiFAD78-1A TAAAGCCTCTTCCTTGTATCTACGATAGACCCGTCGCTGGCGTTATCTCGAGGAGTTCTT 119  
GraFAD78-1D TAAAGCCTCTTCCTTGTATCTACGATAGACCCGTCGCTGGCGTTATCTCGAGGAGTTCTT 120  
GhiFAD78-1D TAAAGCCTCTTCCTTGTATCTACGATAGACCCGTCGCTGGCGTTATCTCGAGGAGTTCTT 112  
\*\*\*\*\*

GheFAD78-1A CAAAATCCAGATTTTTAACCAAAAACAAGAATTTCCAGATCTAAAAATATTAATCCAA 180  
GhiFAD78-1A CAAAATCCAGATTTTTAACCAAAAACAAGAATTTCCAGATCTAAAAATATTAATCCAA 179  
GraFAD78-1D CAAAATCCAGATTTTTAACCAAAAACAAGAATTTCCAGGTCAAAAACGTTAAATCCAA 180  
GhiFAD78-1D CAAAATCCAGATTTTTAACCAAAAACAAGAATTTCCAGGTCAAAAACGTTAAATCCAA 172  
\*\*\*\*\*

GheFAD78-1A TCAAATCCAGGAAGTGGGCTAAACGTGAGTGCCCATTTAGAGTTGCATCCGTTGAAG 240  
GhiFAD78-1A TCAAATCCAGGAAGTGGGCTAAACGTGAGTGCCCATTTAGAGTTGCATCCGTTGAAG 239  
GraFAD78-1D TCAAATCCAGGAAGTGGGCTAAACGTGAGTGCCCATTTAGAGTTGCATCCGTTGAAG 240  
GhiFAD78-1D TCAAATCCAGGAAGTGGGCTAAACGTGAGTGCCCATTTAGAGTTGCATCCGTTGAAG 232  
\*\*\*\*\*

GheFAD78-1A AAGATGAGGGAAGGAAAGAGAGGAACCATGGTATTAATGGATTTGAGGAACAAGAACAAG 300  
GhiFAD78-1A AAGATGAGGGAAGGAAAGAGAGGAACCATGGTATTAATGGATTTGAGGAACAAGAACAAG 299  
GraFAD78-1D AAGATGAGGGAAGGAAAGAGAGGAACCATGGTATTAATGGATTTGAGGAACAAGAACAAG 300  
GhiFAD78-1D AAGATGAGGGAAGGAAAGAGAGGAACCATGGTATTAATGGATTTGAGGAACAAGAACAAG 292  
\*\*\*\*\*

GheFAD78-1A AGGCAGGTTTCGACCCTGGGGCGCCTCCGCCGTTTAAAGTTGGCTGATATAAGAGCGGCCA 360  
GhiFAD78-1A AGGCAGGTTTCGACCCTGGGGCGCCTCCGCCGTTTAAAGTTGGCTGATATAAGAGCGGCCA 359  
GraFAD78-1D AGGCAGGTTTCGACCCTGGGGCGCCTCCGCCGTTTAAAGTTGGCTGATATAAGAGCGGCCA 360  
GhiFAD78-1D AGGCAGGTTTCGACCCTGGGGCGCCTCCGCCGTTTAAAGTTGGCTGATATAAGAGCGGCCA 352  
\*\*\*\*\*

GheFAD78-1A TACCGAAGCATTGTTGGGTGAAGGATCCATGGAAATCTATGAGCTACGTGGTGAGGGATG 420  
GhiFAD78-1A TACCGAAGCATTGTTGGGTGAAGGATCCATGGAAATCTATGAGCTACGTGGTGAGGGATG 419  
GraFAD78-1D TACCGAAGCATTGTTGGGTGAAGGATCCATGGAAATCTATGAGCTACGTGGTGAGGGATG 420  
GhiFAD78-1D TACCGAAGCATTGTTGGGTGAAGGATCCATGGAAATCTATGAGCTACGTGGTGAGGGATG 412  
\*\*\*\*\*

GheFAD78-1A TCGCTGTGGTGTAGGCCTGGCGGCTGCTGCGGTCTATGTTAACAACCTGGATTGTTTGGC 480  
GhiFAD78-1A TCGCTGTGGTGTAGGCCTGGCGGCTGCTGCGGTCTATGTTAACAACCTGGATTGTTTGGC 479  
GraFAD78-1D TCGCTGTGGTGTAGGCCTGGCGGCTGCTGCGGTCTATGTTAACAACCTGGATTGTTTGGC 480  
GhiFAD78-1D TCGCTGTGGTGTAGGCCTGGCGGCTGCTGCGGTCTATGTTAACAACCTGGATTGTTTGGC 472  
\*\*\*\*\*

GheFAD78-1A CTCTTTACTGGGCTGCTCAAGGAACCATGTTTTGGGCTCTTTTTGTTCTTGGTCATGACT 540  
GhiFAD78-1A CTCTTTACTGGGCTGCTCAAGGAACCATGTTTTGGGCTCTTTTTGTTCTTGGTCATGACT 539  
GraFAD78-1D CTCTTTACTGGGCTGCTCAAGGAACCATGTTTTGGGCTCTTTTTGTTCTTGGTCATGACT 540  
GhiFAD78-1D CTCTTTACTGGGCTGCTCAAGGAACCATGTTTTGGGCTCTTTTTGTTCTTGGTCATGACT 532  
\*\*\*\*\*

GheFAD78-1A GGTAAACTTTTTTTTTTTTTT-GAATTGCATTTGCGAGTTACAACCTCCTCTGTTATTAG 599  
GhiFAD78-1A GGTAAACTTTTTTTTTTTTTT-GAATTGCATTTGCGAGTTACAACCTCCTCTGTTATTAG 599  
GraFAD78-1D GGTAAACTTTTTTTTTTTTTT-GAATTGCATTTGCGAGTTACAACCTCCTCTGTTATTAG 599  
GhiFAD78-1D GGTAAACTTTTTTTTTTTTTT-GAATTGCATTTGCGAGTTACAACCTCCTCTGTTATTAG 591  
\*\*\*\*\*

GheFAD78-1A ATCTGACTGTCTTAATATGTTTCATGGATTTTGTTCATTTCTTTGTGCAGCGGCCACGG 659  
GhiFAD78-1A ATCTGACTGTCTTAATATGTTTCATGGATTTTGTTCATTTCTTTGTGCAGCGGCCACGG 659  
GraFAD78-1D ATCTGACTGTCTTAATATGTTTCATGGATTTTGTTCATTTCTTTGTGCAGCGGCCATGG 659  
GhiFAD78-1D ATCTGACTGTCTTAATATGTTTCATGGATTTTGTTCATTTCTTTGTGCAGCGGCCATGG 651  
\*\*\*\*\*

GheFAD78-1A TAGCTTTTCAAACGATCCCAAGTTAAACAGTGTAGTGGGCATCTCTGCATTTCCAT 719  
GhiFAD78-1A TAGCTTTTCAAACGATCCCAAGTTAAACAGTGTAGTGGGCATCTCTGCATTTCCAT 719  
GraFAD78-1D TAGCTTTTCAAACGATCCCAAGTTAAACAGTGTAGTGGGCATCTCTGCATTTCCAT 719  
GhiFAD78-1D TAGCTTTTCAAACGATCCCAAGTTAAACAGTGTAGTGGGCATCTCTGCATTTCCAT 711  
\*\*\*\*\*

GheFAD78-1A TCTTGTGCCTTACCATGGATGGTATGCCTAGTATTTCTTGAAGGTTTCATCTCTTCTCCA 779  
GhiFAD78-1A TCTTGTGCCTTACCATGGATGGTATGCCTAGTATTTCTTGAAGGTTTCATCTCTTCTCCA 779  
GraFAD78-1D TCTTGTGCCTTACCATGGATGGTATGCCTAGTATTTCTTGAAGGTTTCATCTCTTCTCCA 779  
GhiFAD78-1D TCTTGTGCCTTACCATGGATGGTATGCCTAGTATTTCTTGAAGGTTTCATCTCTTCTCCA 771  
\*\*\*\*\*

GheFAD78-1A TTTGCATATGAAAAGTTTAAATGAATTCATTTCATTATGATTGAACTTTACAGGAGAA 839  
GhiFAD78-1A TTTGCATATGAAAAGTTTAAATGAATTCATTTCATTATGATTGAACTTTACAGGAGAA 839  
GraFAD78-1D TTTGTATATGAAAAGTTTAAATGAATTCATTTCATTATGATTGAACTTTACAGGAGAA 839  
GhiFAD78-1D TTTGTATATGAAAAGTTTAAATGAATTCATTTCATTATGATTGAACTTTACAGGAGAA 831  
\*\*\*\*

GheFAD78-1A TTAGCCACAGGACTCACCATCAAACCATGGTCATGTTGAGAATGATGAATCATGGCACC 899  
GhiFAD78-1A TTAGCCACAGGACTCACCATCAAACCATGGTCATGTTGAGAATGATGAATCATGGCACC 899  
GraFAD78-1D TTAGCCACAGGACTCACCATCAAACCATGGTCATGTTGAGAATGATGAATCATGGCACC 899  
GhiFAD78-1D TTAGCCACAGGACTCACCATCAAACCATGGTCATGTTGAGAATGATGAATCATGGCACC 891  
\*\*\*\*\*

GheFAD78-1A CGGTGAGTTAATTTCTCTCATCTTCTTTTTTTCTCTTATATTGAGAATGATGAATCAGC 959  
GhiFAD78-1A CGGTGAGTTAATTTCTCTCT--CTTCTTTTTTTCTCTTATATTGAGAATGATGAATCAGC 956  
GraFAD78-1D CGGTGAGTTAATTTCTCTCATCTTCTTTTTTTCTCTTATATTGAGAATGATGAATCATG 959  
GhiFAD78-1D CGGTGAGTTAATTTCTCTCATCTTCTTTTTTTCTCTTATATTGAGAATGATGAATCATG 951  
\*\*\*\*\*

GheFAD78-1A GCCTTTGGTCTAAATTGTAACACTTTTGTCAATTC AATTGCAGTTATCTGAGAAGATAT 1019  
GhiFAD78-1A GCCTTTGGTCTAAATTGTAACACTTTTGTCAATTC AATTGCAGTTATCTGAGAAGATAT 1016  
GraFAD78-1D GCCTTTGGTCTAAATTGTAACACTTTTGTCAATTC AATTGCAGTTGCTGAGAAGATAT 1019  
GhiFAD78-1D GCCTTTGGTCTAAATTGTAACACTTTTGTCAATTC AATTGCAGTTGCTGAGAAGATAT 1011  
\*\*\*\*\*

GheFAD78-1A ACAGGAGTTTAGATACTCTAACACGAACATTGCGGTT CATATTGCCTTTTCCCATGCCTTG 1079  
GhiFAD78-1A ACAGGAGTTTAGATACTCTAACACGAACATTGCGGTT CATATTGCCTTTTCCCATGCCTTG 1076  
GraFAD78-1D ACAGGAGTTTAGATACTCTAACACGAACATTGCGGTT CATATTGCCTTTTCCCATGCCTTG 1079  
GhiFAD78-1D ACAGGAGTTTAGATACTCTAACACGAACATTGCGGTT CATATTGCCTTTTCCCATGCCTTG 1071  
\*\*\*\*\*

GheFAD78-1A CATTCCTTTCTACCTTGTAAGTGTTTTTCGTGGTTAT TAAATTTTGATGATTCCTATAT 1139  
GhiFAD78-1A CATTCCTTTCTACCTTGTAAGTGTTTTTCGTGGTTAT TAAATTTTGATGATTCCTATAT 1136  
GraFAD78-1D CATTCCTTTCTACCTTGTAAGTGTTTTTCGTGGTTAT TAAATTTTGATGATTCCTATAT 1139  
GhiFAD78-1D CATTCCTTTCTACCTTGTAAGTGTTTTTCGTGGTTAT TAAATTTTGATGATTCCTATAT 1131  
\*\*\*\*\*

GheFAD78-1A GTTGAGAAATTAATGGTTGATTTCACTTTAAATTGCAGT GGAACAGAAGTCCGGGAAAGA 1199  
GhiFAD78-1A GTTGAGAAATTAATGGTTGATTTCACTTTAAATTGCAGT GGAACAGAAGTCCGGGAAAGA 1196  
GraFAD78-1D GTTGAGAAATTAATGGTTGATTTCACTTTAAATTGCAGT GGAACAGAAGTCCAGGAAAGA 1199  
GhiFAD78-1D GTTGAGAAATTAATGGTTGATTTCACTTTAAATTGCAGT GGAACAGAAGTCCAGGAAAGA 1191  
\*\*\*\*\*

-----S32F----->  
-----S34F----->

GheFAD78-1A GCGGTTGCACTTCGACCCAGCAGTGATTTGTTGTCCCGACCGA ACGAAAAGATGTTA 1259  
GhiFAD78-1A GCGGTTGCACTTCGACCCAGCAGTGATTTGTTGTCCCGACCGA ACGAAAAGATGTTA 1256  
GraFAD78-1D GTGGTTGCACTTCGACCCAGCAGTGATTTGTTGTCCCGACTGAAAGAAAAGATGTGA 1259  
GhiFAD78-1D GTGGTTGCACTTCGACCCAGCAGTGATTTGTTGTCCCGACTGAAAGAAAAGATGTGA 1251  
\* \* \* \* \*

GheFAD78-1A TTACTTCCACTCTATGTTGGACAGCCATGGCTGCTTTTCTT GTTGGCTTGGGTTTCACAA 1319  
GhiFAD78-1A TTACTTCCACTCTATGTTGGACAGCCATGGCTGCTTTTCTT GTTGGCTTGGGTTTCACAA 1316  
GraFAD78-1D TTACTTCCACTCTATGTTGGACAGCCATGGCTGCTATTTCTT GTTGGCTTGGGTTTCACAA 1319  
GhiFAD78-1D TTACTTCCACTCTATGTTGGACAGCCATGGCTGCTATTTCTT GTTGGCTTGGGTTTCACAA 1311  
\*\*\*\*\*

GheFAD78-1A TGGGTCCTATGCAGTTGCTTAAACTATATGGCATTCCATAT TGGGTAGGTTTCAAGTTTC 1379  
GhiFAD78-1A TGGGTCCTATGCAGTTGCTTAAACTATATGGCATTCCATAT TGGGTAGGTTTCAAGTTTC 1376  
GraFAD78-1D TGGGTCCTATGCAGTTGCTTAAAGCTATATGGCATTCCATAT TGGGTAGGTTTCAAGTTTC 1379  
GhiFAD78-1D TGGGTCCTATGCAGTTGCTTAAAGCTATATGGCATTCCATAT TGGGTAGGTTTCAAGTTTC 1371  
\*\*\*\*\*

GheFAD78-1A TTCTTTCAAGGAAACGATATCGGGAAGTAGAAAATATGATTTGACTCGTCTTTGGTTGA 1439  
GhiFAD78-1A TTCTTTCAAGGAAACGATATCGGGAAGTAGAAAATATGATTTGACTCGTCTTTGGTTGA 1436  
GraFAD78-1D TTCTTTCAAGGAAACGATATCGGGAAGTAGAAAATATGATTTGACTCGTCTTTGGTTGA 1439  
GhiFAD78-1D TTCTTTCAAGGAAACGATATCGGGAAGTAGAAAATATGATTTGACTCGTCTTTGGTTGA 1431  
\*\*\*\*\*

GheFAD78-1A TGTTTAGATTTTCGTGATGTGGCTGGATGGGGTTACATACTTGCATCACCATGGTCATGA 1499  
GhiFAD78-1A TGTTTAGATTTTCGTGATGTGGCTGGATGGGGTTACATACTTGCATCACCATGGTCATGA 1496  
GraFAD78-1D TGTTTAGATTTTCGTGATGTGGCTGGATGGGGTTACATACTTGCATCACCATGGTCATGA 1499  
GhiFAD78-1D TGTTTAGATTTTCGTGATGTGGCTGGATGGGGTTACATACTTGCATCACCATGGTCATGA 1491  
\*\*\*\*\*

GheFAD78-1A AGAGAAGCTTCCTTGGTACCGTGGGAAGGTATATGAAATTTGTGGTCTAATTTAATATG 1559  
GhiFAD78-1A AGAGAAGCTTCCTTGGTACCGTGGGAAGGTATATGAACTTTGTGGTCTAATTTAATATG 1556  
GraFAD78-1D AGAGAAGCTTCCTTGGTACCGTGGGAAGGTATATGAAATTTGTGGTCTAATTTAATATG 1559  
GhiFAD78-1D AGAGAAGCTTCCTTGGTACCGTGGGAAGGTATATGAAATTTGTGGTCTAATTTAATATG 1551  
\*\*\*\*\*

GheFAD78-1A CTAAGGCGCCTATGTTGAAATTCATATGGAACTTACAAATAAAATAACAAATATGGATA 1619  
GhiFAD78-1A CTAAGGCGCCTATGTTGAAATTCATATGGAACTTACAAATAAAATAACAAATATGGATA 1616  
GraFAD78-1D CTAAGGCGCCTATGTTGAAATTCATATGGAACTTACAAATAAAATAAATAATATGGATA 1619  
GhiFAD78-1D CTAAGGCGCCTATGTTGAAATTCATATGGAACTTACAAATAAAATAAATAATATGGATA 1611  
\*\*\*\*\*

GheFAD78-1A GGAATGGAGTTACTTAAGGGGAGGTCTTACAACACTTGACCGTGACTATGGATGGATCAA 1679  
GhiFAD78-1A GGAATGGAGTTACTTAAGGGGAGGTCTTACAACACTTGACCGTGACTATGGATGGATCAA 1676  
GraFAD78-1D GGAATGGAGTTACTTAAGGGGAGGTCTTACAACACTTGACCGTGACTATGGATGGATCAA 1679  
GhiFAD78-1D GGAATGGAGTTACTTAAGGGGAGGTCTTACAACACTTGACCGTGACTATGGATGGATCAA 1671  
\*\*\*\*\*

GheFAD78-1A CAACATCCACCATGATATTGGAACCCATGTCATACACCATTTGTTCCACAATCCACA 1739  
GhiFAD78-1A CAACATCCACCATGATATTGGAACCCATGTCATACACCATTTGTTCCACAATCCACA 1736  
GraFAD78-1D CAACATCCACCATGATATTGGAACCCATGTCATACACCATTTGTTCCACAATCCACA 1739  
GhiFAD78-1D CAACATCCACCATGATATTGGAACCCATGTCATACACCATTTGTTCCACAATCCACA 1731  
\*\*\*\*\*

GheFAD78-1A CTACCATTTAGTAGAGGCGGTTAGTACCTTTACGTATCTCTTTTTTTTTTT---CCACTT 1795  
GhiFAD78-1A CTACCATTTAGTAGAGGCGGTTAGTACCTTTACGTATCTCTTTTTTTTTTTTCCCCTT 1796  
GraFAD78-1D TTACCATTTAGTAGAGGCGGTTAGTACCTTTACGTATCTCTTTTTTTTTTT---CCACTT 1795  
GhiFAD78-1D TTACCATTTAGTAGAGGCGGTTAGTACCTTTACGTATCTCTTTTTTTTTTT---CCACTT 1787  
\*\*\*\*\*

GheFAD78-1A TGATGTTCTCTTATTTTCATTTTTTTT-TCTAATTATTATGTTGGTATAATGTTGTGTCATA 1854  
GhiFAD78-1A TGATGTTCTCTTATTTTCATTTGGTTT-TCTAATTATTATGTTGGTATAATGTTGTGTCATA 1856  
GraFAD78-1D TGATGTTCTCTTATTTTCATTTGGTTT-TCTAATTGTTATGTTGGTATAATGTTGTGTCATA 1854  
GhiFAD78-1D TGATGTTCTCTTATTTTCATTTGGTTT-TCTAATTGTTATGTTGGTATAATGTTGTGTCATA 1846  
\*\*\*\*\*

<-----S33R----->

GheFAD78-1A GACCGAGGCAGCGAAGCCAGTTCTCGGAAAATACTATCGAGAGCCGGAACAATCAGGGCC 1914  
GhiFAD78-1A GACCGAGGCAGCGAAGCCAGTTCTCGGAAAATACTATCGAGAGCCGGAACAATCAGGGCC 1916  
GraFAD78-1D GACTGAGGCAGCGAGGCCAGTTCTCGGAAAATACTATCGAGAGCCGGAACAATCAGGGCC 1914  
GhiFAD78-1D GACTGAGGCAGCGAGGCCAGTTCTCGGAAAATACTATCGAGAGCCGGAACAATCAGGGCC 1906  
\*\*\*\*\*

<----->

GheFAD78-1A TTTACCTTTCCACCTCATCGGAAGTTTGATGAGAAGCTTGAAGAACGATCATTATGTTAG 1974  
GhiFAD78-1A TTTACCTTTCCACCTCATCGGAAGTTTGATGAGAAGCTTGAAGAACGATCATTATGTTAG 1976  
GraFAD78-1D TTTACCTTTCCACCTCATCGGAAGTTTGATGAGAAGCTTGAAGAAGATCACTATGTTAG 1974  
GhiFAD78-1D TTTACCTTTCCACCTCATCGGAAGTTTGATGAGAAGCTTGAAGAAGATCACTATGTTAG 1966  
\*\*\*\*\*

---S35R---

GheFAD78-1A TGACACTGGGGATGTTGTTTACTACCAAAGTACCAGAACTCAAAAAGAATGCTTCATA 2034  
GhiFAD78-1A TGACACTGGGGATGTTGTTTACTACCAAAGTACCAGAACTCAAAAAGAATGCTTCATA 2036  
GraFAD78-1D TGACACTGGGGATGTTGTTTACTACCAAAGTACCAGAACTCAAAAAGAATGCTTCATA 2034  
GhiFAD78-1D TGACACTGGGGATGTTGTTTACTACCAAAGTACCAGAACTCAAAAAGAATGCTTCATA 2026  
\*\*\*\*\*

GheFAD78-1A AAATAGCTCAGCCCCACAATAATGG 2059  
GhiFAD78-1A AAATAGCTCAGCCCCACAATAATGG C30R 2061  
GraFAD78-1D AAATAGCTCAGCCCCACAATAATGG C14R 2059  
GhiFAD78-1D AAATAGCTCAGCCCCGATGCCAA C16R 2050  
\*\*\*\*\*
