# Supplementary material for: Genome-wide analysis of the omega-3 fatty acid desaturase gene family in Gossypium
Source: PubMed Central journal article supplement (PMC4245742; doi:10.1186/s12870-014-0312-5), 2014-11-18
Supplement: 12870_2014_312_MOESM11_ESM.pdf [file 12870_2014_312_MOESM11_ESM.pdf]

GraFAD78-2D C17F GGCTGAACCTTTGGGAACCTCGTCCCAGAAC 34  
 GhiFAD78-2D C19F TTAG 9  
 GheFAD78-2A C17F GGCTGAACCTTTGGGAACCTTTTTTTAAAGGCTGAACTTTGTACACCTCGTCCCACAAA 60  
 GhiFAD78-2A C19F TTAG 9  
 \*

GraFAD78-2D ACACCTAGCATCAGCCTCCAATGGCCAGTTGGGTTGTATCAGAATGTAGTTTAAAGACCTT 91  
 GhiFAD78-2D AGCTCTAGCATCAGCCTCCAATGGCCAGTTGGGTTGTATCAGAATGTAGTTTAAAGACCTT 64  
 GheFAD78-2A CCACTTAGCATCAGCCTCCAATGGCCAGTTGGGTTGTATCAGAATGTAGTTTAAAGACCTT 120  
 GhiFAD78-2A AGCTCTAGCATCAGCCTCCAATGGCCAGTTGGGTTGTATCAGAATGTAGTTTAAAGACCTT 64  
 \*\*\*\*\*

GraFAD78-2D TCACTGCCGTCAAATCCACCATAAACCTAGACCTTCATTACCTTCAAACACCATTAAATG 151  
 GhiFAD78-2D TCACTGCCGTCAAATCCACCATAAACCTAGACCTTCATTACCTTCAAACACCATTAAATG 124  
 GheFAD78-2A TCACTGCCGTCAAATCCACCATAAACCTAGACCTTCATTACCTTCAAACACCATTAAATG 180  
 GhiFAD78-2A TCACTGCCGTCAAATCCACCATAAACCTAGACCTTCATTACCTTCAAACACCATTAAATG 124  
 \*\*\*\*\*

GraFAD78-2D CTTTCAAGTTCAAACCTTTACCATGTTCTGCATTCAAGGTCCCAACTTTATGGTCTAAAG 211  
 GhiFAD78-2D CTTTCAAGTTCAAACCTTTACCATGTTCTGCATTCAAGGTCCCAACTTTATGGTCTAAAG 184  
 GheFAD78-2A CTTTCAAGTTCAAACCTTTACCGTGTCTTCATTCAAGGTCCCAACTTTATGGTCTAAAG 240  
 GhiFAD78-2A CTTTCAAGTTCAAACCTTTACCGTGTCTTCATTCAAGGTCCCAACTTTATGGTCTAAAG 184  
 \*\*\*\*\*

GraFAD78-2D GTAGAACTTGGGGGATTTGGGCTGTGAATGTGAGTGCTCCATTGAAAGTGACAATAA 271  
 GhiFAD78-2D GTAGAACTTGGGGGATTTGGGCTGTGAATGTGAGTGCTCCATTGAAAGTGACAATAA 244  
 GheFAD78-2A GTAGAACTTAGGGGGTGGGGTGTGAATGTGAGTGCTCCATTGAAAGTGACAATAA 300  
 GhiFAD78-2A GTAGAACTTAGGGGGTGGGGTGTGAATGTGAGTGCTCCATTGAAAGTGACAATAA 244  
 \*\*\*\*\*

-----S13F----->  
 GraFAD78-2D CTAGTGAAGAAGATAAAGGTAAGAAGAGAGCACCCTGATGGGGTTAATAATGGTGAGT 331  
 GhiFAD78-2D CTAGTGAAGAAGATAAAGGTAAGAAGAGAGCACCCTGATGGGGTTAATAATGGTGAGT 304  
 GheFAD78-2A CTAGTGAAGAAGATAAAGGTAAGAAGAGAGCACCCTGATGGGGTTAATAATGGTGAGT 360  
 GhiFAD78-2A CTAGTGAAGAAGATAAAGGTAAGAAGAGAGCACCCTGATGGGGTTAATAATGGTGAGT 304  
 \*\*\*\*\*

GraFAD78-2D TTGACCCCTGGTGCAGCACCTCCCTTTTAAAGTTGCTGATATTAAGCTGCAATACCAAAC 391  
 GhiFAD78-2D TTGACCCCTGGTGCAGCACCTCCCTTTTAAAGTTGCTGATATTAAGCTGCAATACCAAAC 364  
 GheFAD78-2A TTGACCCCTGGTGCAGCACCTCCCTTTTAAAGTTGCTGATATTAAGCTGCAATACCAAAC 420  
 GhiFAD78-2A TTGACCCCTGGTGCAGCACCTCCCTTTTAAAGTTGCTGATATTAAGCTGCAATACCAAAC 364  
 \*\*\*\*\*

GraFAD78-2D ATTGTTGGGTTAAAGATCCATGGAGATCTATGAGTTATGTTGTGAGAGATGTTGTTGTTG 451  
 GhiFAD78-2D ATTGTTGGGTTAAAGATCCATGGAGATCTATGAGTTATGTTGTGAGAGATGTTGTTGTTG 424  
 GheFAD78-2A ATTGTTGGGTTAAAGATCCATGGAGATCTATGAGTTATGTTGTGAGAGATGTTGTTGTTG 480  
 GhiFAD78-2A ATTGTTGGGTTAAAGATCCATGGAGATCTATGAGTTATGTTGTGAGAGATGTTGTTGTTG 424  
 \*\*\*\*\*

GraFAD78-2D TGTTTGGATTGGCTGCTGTTGCTGCTTATTTCAATAACTGGTTTGGTTGGCCACTTTTAT 511  
 GhiFAD78-2D TGTTTGGATTGGCTGCTGTTGCTGCTTATTTCAATAACTGGTTTGGTTGGCCACTTTTAT 484  
 GheFAD78-2A TGTTTGGATTGGCTGCTGTTGCTGCTTATTTCAATAACTGGTTTGGTTGGCCACTTTTAT 540  
 GhiFAD78-2A TGTTTGGATTGGCTGCTGTTGCTGCTTATTTCAATAACTGGTTTGGTTGGCCACTTTTAT 484  
 \*\*\*\*\*

GraFAD78-2D GGATTGCTCAAGGAACCATGTTTTGGGCACCTTTTGTCTTGGTTCATGACTGGTAAATAA 571  
 GhiFAD78-2D GGATTGCTCAAGGAACCATGTTTTGGGCACCTTTTGTCTTGGTTCATGACTGGTAAATAA 544  
 GheFAD78-2A GGATTGCTCAAGGAACCATGTTTTGGGCACCTTTTGTCTTGGTTCATGACTGGTAAATAA 600  
 GhiFAD78-2A GGATTGCTCAAGGAACCATGTTTTGGGCACCTTTTGTCTTGGTTCATGACTGGTAAATAA 544  
 \*\*\*\*\*

GraFAD78-2D TAATTATCCTGTTTTGCTTGTCTCCTTCTGTTTGTCACTTTTGGACCATAAAAAACATTGA 631  
 GhiFAD78-2D TAATTATCCTGTTTTGCTTGTCTCCTTCTGTTTGTCACTTTTGGACCATAAAAAACATTGA 604  
 GheFAD78-2A TAATTACCTGTTTTGCTTGTCTCCTTCTGTTTGTCACTTCTGGACCATAAAAAACATTGA 660  
 GhiFAD78-2A TAATCACCTGTTTTGCTTGTCTCCTTCTGTTTGTCACTTCTGGACCATAAAAAACATTGA 604  
 \*\*\*\* \* \*\*\*\*\*

GraFAD78-2D ATTTGGACATTGACATTGGTCTTGTCTT---TTTTTTTTTTTTTTTTTGCAGTGGACAT 687  
 GhiFAD78-2D ATTTGGACATTGACATTGGTCTTGTCTTCTTCTTTTTTTTTTTTTTTTTTGCAGTGGACAT 664  
 GheFAD78-2A ATTTGGACATTGACATTGGTCTTGTCTT-----CTTTTTTTTTTTT--GCAGTGGACAT 712  
 GhiFAD78-2A ATTTGGACATTGACATTGGTCTTGTCTT---CTTTTTTTTTTTTTTGCAGTGGACAT 658  
 \*\*\*\*\*

|              |                                                                       |      |
|--------------|-----------------------------------------------------------------------|------|
| GraFAD78-2D  | <u>GGTAGTTTTTCCAATAATCCAGCTTTGAATAGTGTGCAGGTCATCTTCTTCATTCTTCA</u>    | 747  |
| GhiFAD78-2D  | <u>GGTAGTTTTTCCAATAATCCAGCTTTGAATAGTGTGCAGGTCATCTTCTTCATTCTTCA</u>    | 724  |
| GheFAD78-2A  | <u>GGTAGTTTTTCCAATAATCCAGCTTTGAATAGTGTGCAGGTCATCTTCTTCATTCTTCA</u>    | 772  |
| GhiFAD78-2A  | <u>GGTAGTTTTTCCAATAATCCAGCTTTGAATAGTGTGCAGGTCATCTTCTTCATTCTTCA</u>    | 718  |
| *****        |                                                                       |      |
| GraFAD78-2D  | <u>ATCCTTGTTCCATACCATGGATGGTTCAGTCTCTGAACCTTTTCTTTTGGTCAAATTCG</u>    | 807  |
| GhiFAD78-2D  | <u>ATCCTTGTTCCATACCATGGATGGTTCAGTCTCTGAACCTTTTCTTTTGGTCAAATTCG</u>    | 784  |
| GheFAD78-2A  | <u>ATCCTTGTTCCATACCATGGATGGTTCAGTCTCTGAACCTTTTCTTTTGGTCAAATTCG</u>    | 832  |
| GhiFAD78-2A  | <u>ATCCTTGTTCCATACCATGGATGGTTCAGTCTCTGAACCTTTTCTTTTGGTCAAATTCG</u>    | 777  |
| *****        |                                                                       |      |
| GraFAD78-2D  | <u>CTATTAGTCCCTCTACTTTACAGAAATGTTAATTTGGTCATTTTAAATCCTTGTAATTT</u>    | 867  |
| GhiFAD78-2D  | <u>CTATTAGTCCCTCTACTTTACAGAAATGTTAATTTGGTCATTTTAAATCCTTGTAATTT</u>    | 844  |
| GheFAD78-2A  | <u>CTATTAGTCCCTCTACTTTACAGAAATGTTAATTTGGTCATTTTAAATCCTTGTAATTT</u>    | 892  |
| GhiFAD78-2A  | <u>CTATTAGTCCCTCTACTTTACAGAAATGTTAATTTGGTCATTTTAAATCCTTGTAATTT</u>    | 837  |
| *****        |                                                                       |      |
| GraFAD78-2D  | <u>CAGTCCGCACTGCTATTTTCAAATTCATGCAGTTATACCTATAATGCTTTTTCAGCAT</u>     | 927  |
| GhiFAD78-2D  | <u>CAGTCCGCACTGCTATTTTCAAATTCATGCAGTTATACCTATAATGCTTTTTCAGCAT</u>     | 904  |
| GheFAD78-2A  | <u>CAGTCTGCAGTCTGCTATTTTCAAATTCATGCAGTTATACCTATAATGCTTTTTCAGCAT</u>   | 952  |
| GhiFAD78-2A  | <u>CAGTCTGCAGTCTGCTATTTTCAAATTCATGCAGTTATACCTATAATGCTTTTTCAGCAT</u>   | 897  |
| *****        |                                                                       |      |
| GraFAD78-2D  | <u>GTTATTTCAACATATTACTTACTAAAAATCTGGTTAATAGATTAACGACTATTATTTACT</u>   | 987  |
| GhiFAD78-2D  | <u>GTTATTTCAACATATTACTTACTAAAAATCTGGTTAATAGATTAACGACTATTATTTACT</u>   | 964  |
| GheFAD78-2A  | <u>GTTATTTCAACATATTATTTACTAAAAATCCAGTTAATAGATTAACAACATATCATCTACT</u>  | 1012 |
| GhiFAD78-2A  | <u>GTTATTTCAACATATTATTTACTAAAAATCCGGTTAATAGATTAACGACTATCATCTACT</u>   | 957  |
| *****        |                                                                       |      |
| GraFAD78-2D  | <u>TCAAGCTTGAAATTTCAAATTCAAAATCTGTA-GGACTTAGAATGATCCAATTAGAGAA</u>    | 1046 |
| GhiFAD78-2D  | <u>TCAAGCTTGAAATTTCAAATTCAAAATCTGTA-GGACTTAGAATAATCCAATTAGAGAA</u>    | 1023 |
| GheFAD78-2A  | <u>TCAAGCTTGAAATTTCAAATTCAAAATCTGTAAGGACTTAGAATGATCTAATTAGAGAA</u>    | 1072 |
| GhiFAD78-2A  | <u>TCAAGCTTGAAATTTCAAATTCAAAATCTGTAAGGACTTAGAATGATCCAATTAGAGAA</u>    | 1017 |
| *****        |                                                                       |      |
| GraFAD78-2D  | <u>TACAGACTAAATCTACAACGTACACAGTACAAGACTAGTAATTGAATTTAACCAATAAG</u>    | 1106 |
| GhiFAD78-2D  | <u>TACGGACTAAATCTACAACGTACACAGTACAAGACTAGTAATTGAATTTAACCAATAAG</u>    | 1083 |
| GheFAD78-2A  | <u>TATGGACTAAATCTACAACGTACACAATACAAGACTAGTAATTGAATTTAACCAATAAG</u>    | 1132 |
| GhiFAD78-2A  | <u>GAATTAACATAATCTACAACGTACACAGTACAAGACTATTAATTTGAATTTAACCAATAAG</u>  | 1077 |
| ** *****     |                                                                       |      |
| GraFAD78-2D  | <u>GATTAAAAATGGTCAAATTTAAAGTATAAGGACTAAATTCACAACCTTTTACAAAGTACAGG</u> | 1166 |
| GhiFAD78-2D  | <u>GATTAAAAATGGTCAAATTTAAAGTATAAGGACTAAATTCACAACCTTTTACAAAGTACAGG</u> | 1143 |
| GheFAD78-2A  | <u>GATTAAAAATGGTCAAACTAAAGTATAAGGACTAAATTCACAACCTTTTACAAAGTACAGG</u>  | 1192 |
| GhiFAD78-2A  | <u>GATTAAAAATGGTCAAATTTAAAGTATAAGGACTAAATTCACAACCTTTTACAAAGTACAGG</u> | 1137 |
| *****        |                                                                       |      |
| GraFAD78-2D  | <u>GACTAATGTCAGAAATTTAACATTTACTTTTATATCCAATTACCAACTTCTTTCAACAATT</u>  | 1226 |
| GhiFAD78-2D  | <u>GACTAATGTCAGAAATTTAACATTTACTTTTATATCCAATTACCAACTTCTTTCAACAATT</u>  | 1203 |
| GheFAD78-2A  | <u>GACTTATAGCAGAAATTTAACATTTACTTTTATATCCAATTACCAACTTCTTTCAACAATT</u>  | 1252 |
| GhiFAD78-2A  | <u>GAATTTATAGCAGAAATTTAACATTTACTTTTATATCCAATTACCAACTTCTTTCAACAATT</u> | 1197 |
| ** * * ***** |                                                                       |      |
| GraFAD78-2D  | <u>TTGATCGTATATGCAGGAGAATTAGCCATAGAACTCATCACCAGAATCATGGGCACATCG</u>   | 1286 |
| GhiFAD78-2D  | <u>TTGATCGTATATGCAGGAGAATTAGCCATAGAACTCATCACCAGAATCACGGGCACGTCG</u>   | 1263 |
| GheFAD78-2A  | <u>TTGATCATATATGCAGGAGAATTAGCCATAGAACTCATCACCAGAATCACGGGCATGTGCG</u>  | 1312 |
| GhiFAD78-2A  | <u>TTGATCATATATGCAGGAGAATTAGCCATAGAACTCATCACCAGAATCACGGGCATGTGCG</u>  | 1257 |
| *****        |                                                                       |      |
| GraFAD78-2D  | <u>AAAATGACGAGTCATGGCATCCGGTAATGTCGGCCACCACAACCCTTTCTTACATGTAAA</u>   | 1346 |
| GhiFAD78-2D  | <u>AAAATGACGAGTCATGGCATCCGGTAATGTCGGCCACCACAACCCTTTCTTACATGTAAA</u>   | 1323 |
| GheFAD78-2A  | <u>AAAATGACGAGTCATGGCATCCGGTAATGTCGGCCACCACAACCCTTTCTTACATGTAAA</u>   | 1372 |
| GhiFAD78-2A  | <u>AAAATGACGAGTCATGGCATCCGGTAACGTCGGCCACCACAACCCTTTCTTACATGTAAA</u>   | 1317 |
| *****        |                                                                       |      |
| GraFAD78-2D  | <u>TTTTCATTACAAGTGAATTTCTTTACCTTTTATTGTCAGTTGCTGAGAAAAATTTACA</u>     | 1406 |
| GhiFAD78-2D  | <u>TTTTCATTACAAGTGAATTTCTTTACCTTTTATTGTCAGTTGCTGAGAAAAATTTACA</u>     | 1383 |
| GheFAD78-2A  | <u>TTTTCATTACAAGTGAATTTCTTTACCTTTTATTGTCAGTTGCTGAGAAAAATTTACA</u>     | 1432 |
| GhiFAD78-2A  | <u>TTTTCATTACAAGTGAATTTCTTTACCTTTTATTGTCAGTTGCTGAGAAAAATTTACA</u>     | 1377 |
| *****        |                                                                       |      |

GraFAD78-2D AGAGTTTGGACAATGCAACAAGATTATTGAGGTTACCTTGCCTTCCCTATGCTTGCTT 1466  
GhiFAD78-2D AGAGTTTGGACAATGCAACAAGATTATTGAGGTTACCTTGCCTTCCCTATGCTTGCTT 1443  
GheFAD78-2A AGAGTTTGGACAATGCAACAAGATTATTGAGGTTACCTTGCCTTCCCTATGCTTGCTT 1492  
GhiFAD78-2A AGAGTTTGGACAATGCAACAAGATTATTGAGGTTACCTTGCCTTCCCTATGCTTGCTT 1437  
\*\*\*\*\*

GraFAD78-2D ATCCTATCTATCTGGTAAGCCATAGATGTTGGATTTCGGTTTACGAATCGAGTGATTCGTG 1526  
GhiFAD78-2D ATCCTATCTATCTGGTAAGCCATAGATGTTGGATTTCGGTTTACGAATCGAGTGATTCGTG 1503  
GheFAD78-2A ATCCTATCTATCTGGTAAGCCATAGATGTTGGATTTCGGTTTACGAATCAAATGAT----A 1548  
GhiFAD78-2A ATCCTATCTATCTGGTAAGCCATAGATGTTGGATTTCGGTTTACGAATCGAATGAT----A 1493  
\*\*\*\*\*

GraFAD78-2D TTTATATTGACTCATGTTGTTCCGATCAACAGTGGAGTTCGAAGTCCCGGAAAAAGGGT 1586  
GhiFAD78-2D TTTATATTGACTCATGTTGTTCCGATAAACAGTGGAGTTCGAAGTCCCGGAAAAAGGGT 1563  
GheFAD78-2A TTTATATTGACTCATGTTGTTACGGTCAACAGTGGAGTTCGAAGTCCCGGAAAAAGGGT 1608  
GhiFAD78-2A TTTATATTGACTCATGTTGTTTACGGTCAACAGTGGAGTTCGAAGTCCCGGAAAAAGGGT 1553  
\*\*\*\*\*

GraFAD78-2D TCACATTTCCATCCGGACAGTGATTTATTTGTCCCAAATGAAAGGAAAGATATAATCACC 1646  
GhiFAD78-2D TCACATTTCCATCCAGACAGTGATTTATTTGTCCCAAATGAAAGGAAAGATATAATCACC 1623  
GheFAD78-2A TCACATTTCCATCCAGACAGTGATTTATTTGTCCCAAATGAAAGGAAAGATATAATCACC 1668  
GhiFAD78-2A TCACATTTCCATCCAGACAGTGATTTATTTGTCCCAAATGAAAGGAAAGATATAATCACC 1613  
\*\*\*\*\*

-----S15F----->

GraFAD78-2D TCAACTGCTTGTGGACGGCAATGGTTGGCTTGCCTTGCATATTTGTCTTTTGAATGGGA 1706  
GhiFAD78-2D TCAACTGCTTGTGGACGGCAATGGTTGGCTTGCCTTGCATATTTGTCTTTTGAATGGGA 1683  
GheFAD78-2A TCAACTGCTTGTGGACAGCAATGGTTGGCTTGCCTTGCATATTTGTCTTTTGAATGGGA 1728  
GhiFAD78-2A TCAACTGCTTGTGGACAGCAATGGTTGGCTTGCCTTGCATATTTGTCTTTTGAATGGGA 1673  
\*\*\*\*\*

GraFAD78-2D CCAATGCCATTGCTTAAACTCTACGGCATCCCTTATGCGGTACATGCTTCAGTTCCTACA 1766  
GhiFAD78-2D CCAATGCCATTGCTTAAACTCTACGGCATCCCTTATGCGGTACATGCTTCAGTTCCTACA 1743  
GheFAD78-2A CCAATGCCATTGCTTAAACTCTACGGCATCCCTTATGCGGTACATGCTTCAGTTCCTACA 1788  
GhiFAD78-2A CCAATGCCATTGCTTAAACTCTACGGCATCCCTTATGCGGTACATGCTTCAGTTCCTACA 1733  
\*\*\*\*\*

GraFAD78-2D TATATTTCTTCAAACAATTTCCGGTAAAAGTACTACGAAGGCCTTTAGATTAGAAATCGA 1826  
GhiFAD78-2D TATATTTCTTCAAACAATTTCCGGTAAAAGTACTACGAAGGCCTTTAGATTAGAAATCGA 1803  
GheFAD78-2A TATATTTCTTCAAACAATTTCCGGTAAAAGTACTACGAAGGCCTTTAGACTAGAAACCA 1848  
GhiFAD78-2A TATATTTCTTCAAACAATTTCCGGTAAAAGTACTACGAAGGCCTTTAGACTAGAAACCA 1793  
\*\*\*\*\*

GraFAD78-2D ATTGCATTTTACCCCTTCTATTTAAAATAAGCAAATGGTCCCTTCTGTTAAAATTTTTAT 1886  
GhiFAD78-2D ATTGCATTTTACCCCTTCTATTTAAAATAAGCAAATGGTCCCTTCTGTTAAAATTTTTAT 1863  
GheFAD78-2A ATTGCATTTTACCCCTTCTATTTAAAATAAGCAAATGGTCCCTTCT----- 1894  
GhiFAD78-2A ATTGCATTTTACCCCTTCTATTTAAAATAAGCAAATGGTCCCTTCT----- 1839  
\*\*\*\*\*

GraFAD78-2D CCATTTT TAGTGTAAAAGTTGACCCTTATGTTTCGGTTATTTCAGTCCAGCAGTTTT 1946  
GhiFAD78-2D CCATTTT-AGTGTAAAAGTTGACCCTTATGTTTCGGTTATTTCAGCCAGTCCAGCAGTTTT 1922  
GheFAD78-2A -----ACGTT-----AGTTTT 1905  
GhiFAD78-2A -----ACGTT-----AGTTTT 1850  
\* \* \* \* \*

GraFAD78-2D TAACAATAAAAAATGAATGAAATTTTTACCAGAAAGGCCAAGTTGCTCTTAAATCTAACG 2006  
GhiFAD78-2D TAACAATAAAAAATGAATGAAATTTTTACCAGAAAGGCCAAGTTGCTCTTAAATCTAACG 1982  
GheFAD78-2A TAACAATAAAAAATGAACGAAATTTTTAACAGAAAGGCCAATTTGCTCTTAAATCTAACG 1965  
GhiFAD78-2A TAACAATAAAAAATGAACGAAATTTTTAACAGAAAGGCCAAGTTGCTCTTAAATCTAACG 1910  
\*\*\*\*\*

GraFAD78-2D TAGAAGGACTAAATGGCCATTTTTGAGTGAATGGAGTAAAATGCAATCTAACTCTCAG 2066  
GhiFAD78-2D TACAAGGACCAATTTGCCATTTTTGAGTGAATGGAGTAAAATGCAATCTAACTCTCAG 2042  
GheFAD78-2A TACAGGGACCAATTTGCCATTTTTGAGTGAATGGAGTAAAATGCAATCTAACTCTCAG 2025  
GhiFAD78-2A TACAGGGACCAATTTGCCATTTTTGAGTGAATGGAGTAAAATGCAATCTAACTCTCAG 1970  
\* \* \* \* \*

GraFAD78-2D TACAGGG-CCTTAATGGTACTTCA--AAAAAAAATCATATTTCTGGTCTGATATAATGG 2123  
GhiFAD78-2D TAGAGGGCCTTAATGGTACTTTTACAAAAAAAATCATATTTCTGGTCTGATATAATGG 2102  
GheFAD78-2A TACAGGGTCTTAATGGTACTTTTACAAAAAAAATCATATTTCTGGTCTGATATAATGG 2085  
GhiFAD78-2A TACAGTGGTCTTAATGGTACTTTTACAAAAAAAATTCATATTTCTGGTCTGATATAATGG 2030  
\* \* \* \* \*

|             |                                                                       |           |
|-------------|-----------------------------------------------------------------------|-----------|
| GraFAD78-2D | ATTCACATATAAAATTGCAGATATTTGTGATGTGGTTGGATTGGTGACATACCTACATC           | 2183      |
| GhiFAD78-2D | ATTCACATATAAAATTGCAGATATTTGTGATGTGGTTGGATTGGTGACATACCTACATC           | 2162      |
| GheFAD78-2A | ACTCACATATAAAATGGCAGATATTTGTGATGTGGTTGGATTGGTGACATACCTACATC           | 2145      |
| GhiFAD78-2A | ACTCACATATAAAATGGCAGATATTTGTGATGTGGTTGGATTGGTGACATACCTACATC           | 2090      |
|             | * * * * *                                                             |           |
| GraFAD78-2D | ACCATGGTCATGACGAGAAGCTTCCATGGTATCGAGGAAAGGTTCCGGGATAATGTTTATG         | 2243      |
| GhiFAD78-2D | ACCATGGTCATGACGAGAAGCTTCCATGGTATCGAGGAAAGGTTCCGGGATAATGTTTATG         | 2222      |
| GheFAD78-2A | ACCATGGTCATGACGAGAAGCTTCCATGGTATCGAGGAAAGGTTCCAGGATAATGTTTATG         | 2205      |
| GhiFAD78-2A | ACCATGGTCATGACGAGAAGCTTCCATGGTATCGAGGAAAGGTTCCGGGATAATGTTTATG         | 2150      |
|             | * * * * *                                                             |           |
| GraFAD78-2D | CTTCTTCACCAAGAAACCATCCATGTTATGTATGGTATAACAATTGAAACTTCTCTGTGT          | 2303      |
| GhiFAD78-2D | CTTCTTCACCAAGAAACCATCCATGTTATGTATGGTATAACAATTGAAACTTCTCTGTGT          | 2282      |
| GheFAD78-2A | CTTCTTCACCAAGAAACCATCCATGTTATGTATGGTATAACAATTGAAACTTCTCTGTGT          | 2265      |
| GhiFAD78-2A | CTTCTTCACCAAGAAACCATCCATGTTATGTATGGTATAACAATTGAAACTTCTCTGTGT          | 2210      |
|             | * * * * *                                                             |           |
|             | <-----S37R-----                                                       |           |
| GraFAD78-2D | TTTACTAACCAGGAGTGGAGTTACCTGAGAGGAGGGCTGACGACGCTTGATCGGGATTAT          | 2363      |
| GhiFAD78-2D | TTTACTAACCAGGAGTGGAGTTACCTGAGAGGAGGGCTGACGACGCTTGATCGGGATTAT          | 2342      |
| GheFAD78-2A | TTTACTAACCAGGAGTGGAGTTACCTGAGAGGAGGGCTTACGACGCTTGATCGGGATTAT          | 2325      |
| GhiFAD78-2A | TTTACTAACCAGGAGTGGAGTTACCTGAGAGGAGGGCTTACGACGCTTGATCGGGATTAT          | 2270      |
|             | * * * * *                                                             |           |
| GraFAD78-2D | GGATGGATTAACAACATCCACCACGATATCGGAACTCATGTTATACATCATCTCTCCCT           | 2423      |
| GhiFAD78-2D | GGATGGATTAACAACATCCACCACGATATCGGAACTCATGTTATACATCATCTCTCCCT           | 2402      |
| GheFAD78-2A | GGATGGATTAACAACATCCACCACGATATCGGAACTCATGTTATACATCATCTCTCCCT           | 2385      |
| GhiFAD78-2A | GGATGGATTAACAACATCCACCACGATATCGGAACTCATGTTATACATCATCTCTCCCT           | 2330      |
|             | * * * * *                                                             |           |
| GraFAD78-2D | CAAAATCCCACATTATCACTTGATTGAAGCTGTGAGTATCATCATCATC-----                | 2474      |
| GhiFAD78-2D | CAAAATCCCACATTATCACTTGATTGAAGCTGTGAGTATCATCATCATC-----                | 2453      |
| GheFAD78-2A | CAAAATCCCACATTATCACTTGATTGAAGCTGTGAGTATCATCATCATC-----                | 2445      |
| GhiFAD78-2A | CAAAATCCCACATTATCACTTGATTGAAGCTGTGAGTATCATCATCATC-----                | 2384      |
|             | * * * * *                                                             |           |
| GraFAD78-2D | ---TTATTTTCCCTGCATCAGTTATGTTTGTAGGTTTCCACATACTAAAGAAAATGTTACA         | 2531      |
| GhiFAD78-2D | ---TTATTTTCCCTGCATCAGTTATGTTTGTAGGTTTCCACATACTAAAGAAAATGTTATA         | 2510      |
| GheFAD78-2A | ATCTTATTTCCCTGCATCAGTTATGTTTGTAGGTTTCCACATACTAAAGAAAATGTTACA          | 2505      |
| GhiFAD78-2A | ATCTTATTTCCCTGCATCAGTTATGTTTGTAGGTTTCCACATACTAAAGAAAATGTTACA          | 2444      |
|             | * * *                                                                 |           |
| GraFAD78-2D | TGAATTACAGACCGAAGCAGCAAGCCAGTGCCTCGGGAAATACTACAGGGAGCCAAAGAA          | 2591      |
| GhiFAD78-2D | TGAATTACAGACCGAAGCAGCAAGCCAGTGCCTCGGGAAATACTACAGGGAGCCAAAGAA          | 2570      |
| GheFAD78-2A | TGAATTACAGACCGAAGCAGCAAGCCAGTGCCTCGGGAAATACTACAGGGAGCCAAAGAA          | 2565      |
| GhiFAD78-2A | TGAATTACAGACCGAAGCAGCAAGCCAGTGCCTCGGGAAATACTACAGGGAGCCAAAGAA          | 2504      |
|             | * * * * *                                                             |           |
|             | <-----S16R-----                                                       |           |
| GraFAD78-2D | ATCTGGGCCTTTACCATTTTATTTACTCGGGATACTCATAAAAAGCATGAGAAAGGATCA          | 2651      |
| GhiFAD78-2D | ATCTGGGCCTTTACCATTTTATTTACTCGGGATACTCATAAAAAGCATGAGAAAGGATCA          | 2630      |
| GheFAD78-2A | ATCTGGGCCTTTACCATTTTATTTACTCGGGATACTCATAAAAAGCATGAGAAAGGATCA          | 2625      |
| GhiFAD78-2A | ATCTGGGCCTTTACCATTTTATTTACTCGGGATACTCATAAAAAGCATGAGAAAGGATCA          | 2564      |
|             | * * * * *                                                             |           |
| GraFAD78-2D | TTATGTGAGTGACATTGGTGATGTCGTGACTATCAAACAGATCCTCAACTATATGGAAC           | 2711      |
| GhiFAD78-2D | TTATGTGAGTGACATTGGTGATGTCGTGACTATCAAACAGATCCTCAACTATATGGAAC           | 2690      |
| GheFAD78-2A | TTATGTGAGTGACATTGGTGATGTTGTGACTATCAAACAGATCCTCAACTATATGGAAC           | 2685      |
| GhiFAD78-2A | TTATGTGAGTGACATTGGTGATGTTGTGACTATCAAACAGATCCTCAACTATATGGAAC           | 2624      |
|             | * * * * *                                                             |           |
| GraFAD78-2D | TAACAAATCAGAT <b>TGA</b> AGCACTGAAGTTTCTTTTATCTCTGGCTAAAACCTCTATTCCGG | C18R 2772 |
| GhiFAD78-2D | TAACAAATCAGAT <b>TGA</b> AGCCCTGAAGTTTCT <b>GCATGCTAA</b>             | C20R 2730 |
| GheFAD78-2A | TAACAAATCAGAT <b>TGA</b> AGCACTGAAGTTTCTTTTATCTCTGGCTAAAACCTCTATTCCGG | C18R 2746 |
| GhiFAD78-2A | TAACAAATCAGAT <b>TGA</b> AGCCCTGAAGTTTCT <b>GCATGCTAA</b>             | C20R 2664 |
|             | * * * * *                                                             |           |
