# Supplementary material for: Genome-wide analysis of the omega-3 fatty acid desaturase gene family in Gossypium
Source: PubMed Central journal article supplement (PMC4245742; doi:10.1186/s12870-014-0312-5), 2014-11-18
Supplement: 12870_2014_312_MOESM12_ESM.pdf [file 12870_2014_312_MOESM12_ESM.pdf]

```

GraFAD78-3D C21F TGAGGTTCAATTTCCAAGTCGCA--ATATTTAAAAATAAGAAAGAAAAAGAGAAGAAAC 58
GhiFAD78-3D -----
GheFAD78-3A C21F TGAGGTTCAATTTCCAAGTCGCAACAATATTTAAAAATAAGAAAGAAAAAGAGAAGAAAC 60
GhiFAD78-3A -----

GraFAD78-3D GTCTCAACTCTTTAACAGGCTCTCATTTAGCCGTTTCTGCTATGAAACCCCCAGTAACCC 118
GhiFAD78-3D -----
GheFAD78-3A GTCTCAACTCTTTAACAGGCTCTCATTAGCCGTTTCTGCTATGAAACCCCCAGTAACCC 120
GhiFAD78-3A -----

GraFAD78-3D TAAATATAATGCTCCTCAGTCCTTTACTTCTTAACCAAGTAACCTGCCAGGAACCTCTCA 178
GhiFAD78-3D -----
GheFAD78-3A TAAATATAATGCTCCTCAGTCCTTTGCTTCTTAACCAAGTAACCTGCCAGGAACCTCTCA 180
GhiFAD78-3A -----

GraFAD78-3D GTTCTTTTTTTTTTTTAAAGACCTTTGAGCTTTTACCTGGGATTTTAATGGAGAGTTTTC 238
GhiFAD78-3D C24F -----GGT GAGCTCTACCTGGGATTTTAATGGAGAGTTTTC 36
GheFAD78-3A GTTCTTTTTTTTTT--AAGACCTTTGAGCTTTTACCTGGGATTTCAATGGAGAGTTTTC 237
GhiFAD78-3A C24F -----GGT GAGCTCTACCTGGGATTTTAATGGAGAGTTTTC 36
*****

GraFAD78-3D TCATATCAAATCTGGTTTAAAGCCTCTTCCCTCGTATCTACATAAGACCCATAACTGGTC 298
GhiFAD78-3D TCATATCAAATCTGGTTTAAAGCCTCTTCCCTCGTATCTACATAAGACCCATAACTGGTC 96
GheFAD78-3A TCATATCAAATCTGGTTTAAAGCCTCTTCCCTCGTATCTGCATAAGACCCATAACTGGTC 297
GhiFAD78-3A TCATATCAAATCTGGTTTAAAGCCTCTTCCCTCGTATCTGCATAAGACCCATAACTGGTC 96
*****

GraFAD78-3D TTGTCCCAAGAAATTACTTCTCAAAGCCAAGATTTTTACATACAAGCAAGTGTTTTTCTG 358
GhiFAD78-3D TTGTCCCAAGAAATTACTTCTCAAAGCCAAGATTTTTACATACAAGCAAGTGTTTTTCTG 156
GheFAD78-3A TTGTCCCAAGAAATTACTTCTCAAAGCCAAGATTTTTACATACAAGCAAGTGTTTTTCTG 357
GhiFAD78-3A TTGTCCCAAGAAATTACTTCTCAAAGCCAAGATTTTTACATACAAGCAAGTGTTTTTCTG 156
*****

GraFAD78-3D ATCTAAAGGTGACTACACCATTGAAAGTTGCATCCGTAGAAGAAGATGAAGAAATAAATG 418
GhiFAD78-3D ATCTAAAGGTGACTACACCATTGAAAGTTGCATCCGTAGAAGAAGATGAAGAAATAAATG 216
GheFAD78-3A ATCTAAAGGTGACTACGCCATTGAAAGTTGCATCCGTAGAAGAAGATGAAGAAATAAATG 417
GhiFAD78-3A ATCTAAAGGTGACTACGCCATTGAAAGTTGCATCCGTAGAAGAAGATGAAGAAATAAATG 216
*****
-----S21F----->

GraFAD78-3D AGAGAATGCATGGTATTAACAAGATTGGAGAGCAAGAAGAAGAGACAATATTGACCCTG 478
GhiFAD78-3D AGAGAATGCATGGTATTAACAAGA TTGGAGAGCAAGAAGAAGAGACAATATTGACCCTG 276
GheFAD78-3A AGAGAATGCATGGTATTAACAAGCTTGGAGAGCAAGAACAAGAGACAAGATTGACCCTG 477
GhiFAD78-3A AGAGAATGCATGGTATTAACAAGCTTGGAGAGCAAGAACAAGAGACAAGATTGACCCTG 276
*****

GraFAD78-3D CAGCTCCCCACCGTTTAACTTAGCTGATGTAAGAGCAACCATACCCAGCATTGTTGGG 538
GhiFAD78-3D CAGCTCCCCACCGTTTAACTTAGCTGATGTAAGAGCAACCATACCCAGCATTGTTGGG 336
GheFAD78-3A CAGCTCCCCACCGTTTAACTTAGCTGATGTAAGAGCAAGCATACCCAGCATTGTTGGG 537
GhiFAD78-3A CAGCTCCCCACCGTTTAACTTAGCTGATGTAAGAGCAAGCATACCCAGCATTGTTGGG 336
*****

GraFAD78-3D TAAAGGATCCATGGAAATCTATGAGCTATGTTGTGAGGGATGTTGCTCTTGTTTAAGCT 598
GhiFAD78-3D TAAAGGATCCATGGAAATCTATGAGCTATGTTGTGAGGGATGTTGCTCTTGTTTAAGCT 396
GheFAD78-3A TAAAGGATCCATGGAAATCTATGAGCTATGTTGTGAGGGATGTTGCTCTTGTTTAAGCT 597
GhiFAD78-3A TAAAGGATCCATGGAAATCTATGAGCTATGTTGTGAGGGATGTTGCTCTTGTTTAAGCT 396
*****

GraFAD78-3D TGGCTGCTGCTGTGGTTTATGTTAACAACCTGGCTTGTGGCCTCTTTACTGGGTTGCTC 658
GhiFAD78-3D TGGCTGCTGCTGTGGTTTATGTTAACAACCTGGCTTGTGGCCTCTTTACTGGGTTGCTC 456
GheFAD78-3A TGGCTGCTGCTGTGGTTTATGTTAACAACCTGGCTTGTGGCCTCTTTACTGGGTTGCTC 657
GhiFAD78-3A TGGCTGCTGCTGTGGTTTATGTTAACAACCTGGCTTGTGGCCTCTTTACTGGGTTGCTC 456
*****

GraFAD78-3D AAGGAACCATGTTTTGGGCTCTTTTGTCTTGGTTCATGACTGGTAATTCATACAATGCA 718
GhiFAD78-3D AAGGAACCATGTTTTGGGCTCTTTTGTCTTGGTTCATGACTGGTAATTCATACAATGCA 516
GheFAD78-3A AAGGAACCATGTTTTGGGCTCTTTTGTCTTGGTTCATGACTGGTAATTCATACAATGCA 717
GhiFAD78-3A AAGGAACCATGTTTTGGGCTCTTTTGTCTTGGTTCATGACTGGTAATTCATACAATGCA 516
*****

```

GraFAD78-3D TTGGACACAACCTTCTTTAATTAGGCGTGTGACTGTCTCAATTTATATGTTTATTTTCTT 778  
GhiFAD78-3D TTGGACACAACCTTCTTTAATTAGGCGTGTGACTGTCTCAATTTATATGTTTATTTTCTT 576  
GheFAD78-3A TTGGACACAACCTTCTTTAATTAGGCGTGTGACTGTCTCAGTTTATATGTTTATTTTCTT 777  
GhiFAD78-3A TTGGACACAACCTTCTTTAATTAGGCGTGTGACTGTCTCAGTTTATATGATTATTTTCTT 576  
\*\*\*\*\*

GraFAD78-3D TTCAAGGCTTAATTGGAATACATTGTGCAGCGGCCATGGCAGCTTTTCAAACAACCCCAA 838  
GhiFAD78-3D TTCAAGGCTTAATTGGAATACATTGTGCAGCGGCCATGGCAGCTTTTCAAACAACCCCAA 636  
GheFAD78-3A TTCAAGGCTTAATTGGAATTCATTGTGCAGCGGCCATGGCAGCTTTTCAAACAACCCCAA 837  
GhiFAD78-3A TTCAAGGCTTAATTGGAATTCATTGTGCAGCGGCCATGGCAGCTTTTCAAACAACCCCAA 636  
\*\*\*\*\*

GraFAD78-3D GTTAAACAGTTTGTAGTGGGGCATCTATTGCATTCTTTCATTCTTGTGCCTTACCATGGATG 898  
GhiFAD78-3D GTTAAACAGTTTGTAGTGGGGCATCTATTGCATTCTTTCATTCTTGTGCCTTACCATGGATG 696  
GheFAD78-3A GTTAAACAGTTTGTAGTGGGGCATCTATTGCATTCTTCCATTCTTGTGCCTTATCATGGATG 897  
GhiFAD78-3A GTTAAACAGTTTGTAGTGGGGCATCTATTGCATTCTTCCATTCTTGTGCCTTATCATGGATG 696  
\*\*\*\*\*

GraFAD78-3D GTAAATTTTGTATAATGTTAAACTTAGTCCTCGATGTTTGCATTTTTTTTGTATTTTG 958  
GhiFAD78-3D GTAAATTTTGTATAATGTTAAACTTAGTCCTCGATGTTTGCATTTTTTTTGTATTTTG 756  
GheFAD78-3A GTAAATTTTGTATAATGTTAAACTTAGTCCTCGATGTTTGCATTTTTTTTGTATTTTG 957  
GhiFAD78-3A GTAAATTTTGTATAATGTTAAACTTAGTCCTCGATGTTTGCATTTTTTTTGTATTTTG 756  
\*\*\*\*\*

GraFAD78-3D TCCATTATCTTTATCACATGAGTTTCCACACCATAGTTGAATTCATTTCATTATGATT 1018  
GhiFAD78-3D TCCATTATCTTTATCACATGAGTTTCCACGCCATAGTTGAATTCATTTCATTATGATT 816  
GheFAD78-3A TCCATTATCTTTATCACATGAGTTTCCACACCACAGTTGAATTCATTTCATTATGATT 1017  
GhiFAD78-3A TCCATTATCTTTATCACATGAGTTTCCACACCACAGTTGAATTCATTTCATTATGATT 816  
\*\*\*\*\*

GraFAD78-3D AACTTTTACAGGAGAATTAGCCATAGGATTTCATCACCAAACCAGGGTCATGTTGAGAAT 1078  
GhiFAD78-3D AACTTTTACAGGAGAATTAGCCATAGGATTTCATCACCAAACCAGGGTCATGTTGAGAAT 876  
GheFAD78-3A AACTTTTACAGGAGAATTAGCCATAGGATTTCATCACCAAACCAGGGTCATGTTGAGAAT 1077  
GhiFAD78-3A AACTTTTACAGGAGAATTAGCCATAGGATTTCATCACCAAACCAGGGTCATGTTGAGAAT 876  
\*\*\*\*\*

GraFAD78-3D GATGAATCATGGCACCCGGTTGGTTAAACTTTTCACTGATCTTTTATGGTGCCTGCTTGT 1138  
GhiFAD78-3D GATGAATCATGGCACCCGGTTGGTTAAACTTTTCACTGATCTTTTATGGTGCCTGCTTGT 936  
GheFAD78-3A GATGAATCATGGCACCCGGTTGGTTAAACTTTTCACTGAACCTTTTATGGTGCCTGCTTGT 1137  
GhiFAD78-3A GATGAATCATGGCACCCGGTTGGTTAAACTTTTCACTGAACCTTTTATGGTGCCTGCTTGT 936  
\*\*\*\*\*

GraFAD78-3D TTGGTCTATTGCAACACCTTTGTTCTTCCACCTAGTTTGTGAAATTTATTACAGTTAA 1198  
GhiFAD78-3D TTGGTCTATTGCAACACCTTTGTTCTTCCACCTAGTTTGTGAAATTTATTACAGTTAA 996  
GheFAD78-3A TTGGTCTATTGCAATACCTTTGTTCTTCCACCTAGTTTGTGAAATTTATTACAGTTAA 1197  
GhiFAD78-3A TTGGTCTATTGCAATACCTTTGTTCTTCCACCTAGTTTGTGAAATTTATTACAGTTAA 996  
\*\*\*\*\*

-----S17F----->

GraFAD78-3D CTGAGAAGACATACATGAGTTTGGATAACAATGAACCTAACATGGCGGTTCAAGTTTCCTT 1258  
GhiFAD78-3D CTGAGAAGACATACATGAGTTTGGATAACAATGAACCTAACATGGCGGTTCAAGTTTCCTT 1056  
GheFAD78-3A CTGAGAAAATATACATGAATTTGGATAACAATGAACCTAACATGGCTGTTCAAGTTTCCTT 1257  
GhiFAD78-3A CTGAGAAAATATACATGAATTTGGATAACAATGAACCTAACATGGCTGTTCAAGTTTCCTT 1056  
\*\*\*\*\*

GraFAD78-3D TCCCCTTGCTTGATATACCTTTCTACCTTGTAAAGTGTATATAGCTTGCTTGAGAAATTTG 1318  
GhiFAD78-3D TCCCCTTGCTTGATATACCTTTCTACCTTGTAAAGTGTATATAGCTTGCTTGAGAAATTTG 1116  
GheFAD78-3A TCCCCTTGCTTGATATACCTTTCTACCTTGTAAAGTGTATATAGCTTGCTTGAGAAATTTG 1317  
GhiFAD78-3A TCCCCTTGCTTGATATACCTTTCTACCTTGTAAAGTGTATATAGCTTGCTTGAGAAATTTG 1116  
\*\*\*\*\*

GraFAD78-3D ATCCTTGAGACATCCGAGTTATTACTGTCTGTCTGTTGTTTTAATTGCAGTGGGGGAAAG 1378  
GhiFAD78-3D ATCCTTGAGACATCCGAGTTATTACTGTCTGTCTGTTGTTTTAATTGCAGTGGGGGAAAG 1176  
GheFAD78-3A ATCCTTGAGACATC-GAGTTATTACTGACTGTCTGTGTTTTAATTGCAGTGGGGGAAAG 1376  
GhiFAD78-3A ATCCTTGAGACATC-GAGTTATTACTGACTGTCTGTGTTTTAATTGCAGTGGGGGAAAG 1175  
\*\*\*\*\*

GraFAD78-3D AAGTCCAGGCAAGACTGGTTCTCACTTTGATCCTAACAGCGAATTGTTTGTCCCAAGTGA 1438  
GhiFAD78-3D AAGTCCAGGCAAGACTGGTTCTCACTTTGATCCTAACAGCGAATTGTTTGTCCCAAGTGA 1236  
GheFAD78-3A AAGTCCAGGCAAGACTGGTTCTCACTTTGATCCTAACAGCGAATTGTTTGTCCCAAGTGA 1436  
GhiFAD78-3A AAGTCCAGGCAAGACTGGTTCTCACTTTGATCCTAACAGCGAATTGTTTGTCCCAAGTGA 1235  
\*\*\*\*\*



GraFAD78-3D AATTGAATAATTGGATGATCGTTTTATAACTTTTTATAAATTAATGACCTAAAAAGAAAT 2191  
GhiFAD78-3D AATTGAATAATTGGATGATCGTTTTGTAACCTTTTCATAAATTAATGACCTAAAAAGAAAT 1987  
GheFAD78-3A AATTAAATAATTAGATGATCGTT--CTAACTTTTCATAATTAGATGATTAATAAAGAAAT 2206  
GhiFAD78-3A AATTGAATAATTAGATGATCGTT--GTAACCTTTTCATAATTAGATGATTAATAAAGAAAT 2000  
\*\*\*\* \* 2191

GraFAD78-3D TTACTAATAGATGAATAATTACTTGTATAGTTTACCCTTCTTTTGGTCATACATATGTAT 2251  
GhiFAD78-3D TTACTAATAGATGAATAATTACTTGTATAGTTTACCCTTCTTTTGGTCATACATATGTAT 2047  
GheFAD78-3A TTATTAATAGATGAGTAATTACTTGTATAGTTTACCCTTCTTTTGGTCATACATATGTCT 2266  
GhiFAD78-3A TTACTAATAGATGAGTAATTACTTGTATAGTTTACCCTTCTTTTGGTCATACATATGTCT 2060  
\*\*\* \* 2251

GraFAD78-3D TTACCAGTTATAGAATACAGCTTGACTTTGTTTTCAAGTTTATAGATATTCGTAATTTGGTT 2311  
GhiFAD78-3D TTACCAGTTATAGAATACAGCTTGACTTTGTTTTCAAGTTTATAGATATTCGTAATTTGGTT 2107  
GheFAD78-3A TTACCAGTTATAGAATACAGCTTGACTTTGTTTTCAAGTTTATAGATATTCGTAATTTGGTT 2326  
GhiFAD78-3A TTACCAGTTATAGAATACAGCTTGACTTTGTTTTCAAGTTTATAGATATTCGTAATTTGGTT 2120  
\*\*\*\*\* \* 2311

GraFAD78-3D GGATTTTGTAAACATACATGCATCATCATGGTCATCAAGACAAACTTCCTTGGTACCGTAG 2371  
GhiFAD78-3D GGATTTTGTAAACATACATGCATCATCATGGTCATCAAGACAAACTTCCTTGGTACCGTAG 2167  
GheFAD78-3A GGATTTTGTAAACATACATGCATCATCATGGTCATCAAGACAAACTTCCTTGGTACCGTAG 2386  
GhiFAD78-3A GGATTTTGTAAACATACATGCATCATCATGGTCATCAAGACAAACTTCCTTGGTACCGTAG 2180  
\*\*\*\*\* \* 2371

GraFAD78-3D GAAGGTATGATTCTCTTACCTTGGTCTAATATGTTCTGTCTGTGAGAAGACATCTTTTTG 2431  
GhiFAD78-3D GAAGGTATAATTCTCTTACCTTGGTCTAATATGTTCTGTCTGTGAGAAGACATCTTTTTG 2227  
GheFAD78-3A GAAGGTATGATTCTCTTACCTTGGTCTAATATGTTCTGTCTGTGAGAAGACATCTTTTTG 2446  
GhiFAD78-3A GAAGGTATGATTCTCTTACCTTGGTCTAATATGTTCTGTCTGTGAGAAGACATCTTTTTG 2240  
\*\*\*\*\* \* 2431

GraFAD78-3D GTTTATTTTGAACCTTGACATTACAACATTCTGCAGGAATGGAGTTACTTAAGGGGAGGGC 2491  
GhiFAD78-3D GTTTATTTTGAACCTTGACATTACAACATTCTGCAGGAATGGAGTTACTTAAGGGGAGGGC 2287  
GheFAD78-3A GTTTATTTTGAACCTTGACATTACAACATTCTGCAGGAATGGAGTTACTTAAGGGGAGGGC 2506  
GhiFAD78-3A GTTTATTTTGAACCTTGACATTACAACATTCTGCAGGAATGGAGTTACTTAAGGGGAGGGC 2300  
\*\*\*\*\* \* 2491

GraFAD78-3D TTACAACACTTGACCGTGATTATGGATGGATGAACAACATTCATCATGATATTGGAACCC 2551  
GhiFAD78-3D TTACAACACTTGACCGTGATTATGGATGGATGAACAACATTCATCATGATATTGGAACCC 2347  
GheFAD78-3A TTACAACACTTGACCGTGATTATGGATGGATGAACAACATTCATCATGATATTGGAACCC 2566  
GhiFAD78-3A TTACAACACTTGACCGTGATTATGGATGGATGAACAACATTCATCATGATATTGGAACCC 2360  
\*\*\*\*\* \* 2551

GraFAD78-3D ATGTTATACACCATCTCTTTCCTCAGATCCCTCATTACCACCTTAATAGAGGCTGTGAGTT 2611  
GhiFAD78-3D ATGTCATACACCATCTCTTTCCTCAGATCCCTCATTACCACCTTAATAGAGGCTGTGAGTT 2407  
GheFAD78-3A ATGTCATACACCATCTCTTTCCTCAGATCCCTCATTACCACCTTAATAGAGGCTGTGAGTT 2626  
GhiFAD78-3A ATGTCATACACCATCTCTTTCCTCAGATCCCTCATTACCACCTTAATAGAGGCTGTGAGTT 2420  
\*\*\*\* \* 2611

GraFAD78-3D CATCTCTTTAGTAGTTTTGGCTTGGGTAAAGATACTATGGAAGTCCCGTATTAGGATTT 2671  
GhiFAD78-3D CATCTCTTTAGTAGTTTTGGCTTGGGTAAAGATACTATGGAAGTCCCGTATTAGGATTT 2467  
GheFAD78-3A CATCTCTTTAGTAGTTTTGGCTTGGGTAGAAATACCATGGAAGTCCCTATACTAGGATTT 2686  
GhiFAD78-3A CATCTCTTTAGTAGTTTTGGCTTGGGTAGAAATACCATGGAAGTCCCTATACTAGGATTT 2480  
\*\*\*\*\* \* 2671

GraFAD78-3D AGATTGCATTTTGCCTTATTTACTCAAAAAATGAATAAACTAGTCCCTTACGTTAAATC 2731  
GhiFAD78-3D AAATTGCATTTTGTCTTATTTACTCAAAAAATGAATAAACTAGTCCCTTACGTTAAATC 2527  
GheFAD78-3A AGATTGCATTTTACTTTAATTACTCAAAAAATGAATAAACTAGTTCGTTACGTTAAATC 2746  
GhiFAD78-3A AGATTGCATTTTACCTTAATTACTCAAAAAATGAATAAACTAGTTCGTTACGTTAAATC 2540  
\* \*\*\*\*\* \* 2731

GraFAD78-3D AAAGAGAAAATTAGTCCTTTTCAGTTAAAAATTTCCATCTATTTCTATTGTTAAA-TTGGCA 2790  
GhiFAD78-3D AAAGAGAAAATTAGTCATTTTCAGTTAAAAATTTCCATCTATTTCTATTGTTAAA-TTGGCA 2587  
GheFAD78-3A AAAGAGCAAATTAGTCCTTTTCAGTTAAAAATTTTCATCTATTTTACGGTTAAAAATTTGGCA 2806  
GhiFAD78-3A AAAGAGCAAATTAGTCCTTTTCAGTTAAAAATTTCCATCTATTTCTACTGTTAAAATTTGACA 2600  
\*\*\*\*\* \* 2790

GraFAD78-3D TGACTGATAGAATAACCAGATAGTTACATATGATACGTCACGTGACCTCATGTTAAACAT 2850  
GhiFAD78-3D TGACTGATAGAATAACCAGATAGTTACATATGATACGCCACGTGACCTCATGTTAAAT 2647  
GheFAD78-3A TGACTAATAGAATAAATACATACAGTTACATATGATATGCCACGTATACCTCATGTTAAAT 2866  
GhiFAD78-3A TGACTAATAGAATAAATACATACAGTTACATATGATATGTCAGTATACCTCATGTTAAAT 2660  
\*\*\*\*\* \* 2850

|             |                                                              |                      |
|-------------|--------------------------------------------------------------|----------------------|
| GraFAD78-3D | ATAGAGATGGATGAAATTT-----TTAATACGAGGATCATTTTGCTCTTTACTC       | 2899                 |
| GhiFAD78-3D | ATAGAGATGGATGAAATTT-----TTAATACGAGGACCACCTTGCTCTTTACTC       | 2696                 |
| GheFAD78-3A | ATAAAGATGGATGAAATTT-----TTAATATGAGGACCACCTTGCTCTTTACTC       | 2915                 |
| GhiFAD78-3A | ATAAAGATGGACGAAATTTGGACGAAATTTTAAATTTGAGGACCACCTTGCTCTTTACTC | 2720                 |
|             | *** ***** *****                                              | ***** ***** ** ***** |
| GraFAD78-3D | TAACATGTAGGTATTAATTTACTCATTTTTTAGTAAAGGGGCAAAATGTAATTTAACTTC | 2959                 |
| GhiFAD78-3D | TAACATGTAGGTATTAATTTACTCGTTTTTTAGTAAATGGGCAAAATGTAATTTAACTTC | 2756                 |
| GheFAD78-3A | TAATATTTAGGTATTAATTTGCTTATTTTTTAGTAAATAGGTAAATGTAATCTAACTTT  | 2975                 |
| GhiFAD78-3A | TAATATGTAGGCATTAATTTGCTTATTTTTTAGTAAATAGGTAAATGTAATCTAACTTT  | 2780                 |
|             | *** ** **** ***** * ***** ** ***** *****                     |                      |
| GraFAD78-3D | TAATACAAAGTCCTCCGTGGTAGTTTTACTTTTTGGCTTGTGATATGCTCTTTTTCTAT  | 3019                 |
| GhiFAD78-3D | TAATACAAAGTC-TCCGTGGTAGTTTTACTTTTTGGCTTGTGATATGCTCTTTTTCTAT  | 2815                 |
| GheFAD78-3A | TAATACAAAGGCATCCATGGTAGTTTTACTTTTTGG--TGTGATATGCTCTTTTTCTAT  | 3033                 |
| GhiFAD78-3A | TAATACAAAGGCATCCATGGTAGTTTTACTTTTTGG--TGTGATATGCTCTTTTTCTAT  | 2838                 |
|             | ***** * ** *****                                             | *****                |
| GraFAD78-3D | TTATTTTATGTGTCCTAATGTTTTGGTCTCATAGACTAAGGCAGCTAAGCCGGTTCTTGG | 3079                 |
| GhiFAD78-3D | TTATTTTATGTGTCCTAATGTTTTGGTCTCATAGACTAAGGCAGCTAAGCCGGTTCTTGG | 2875                 |
| GheFAD78-3A | TTATTTTATGTGTCCTAATGTTTTAGTCTCATAGACTAAGGCAGCTAAGCCGGTTCTTGG | 3093                 |
| GhiFAD78-3A | TTATTTTATGTGTCCTAATGTTTTAGTCTCATAGACTAAGGCAGCTAAGCCGGTTCTTGG | 2898                 |
|             | *****                                                        | *****                |
|             | <-----S18R----->                                             |                      |
| GraFAD78-3D | AAAATACTATCGGGAGCCAGAACGATCAGGACCTCTACCTTTTTACCTCATCGGGGTTTT | 3139                 |
| GhiFAD78-3D | AAAATACTATCGGGAGCCAGAACGATCAGGACCTATACTTTTTACCTCATCGGAGTTTT  | 2935                 |
| GheFAD78-3A | AAAATACTATCGGGAGCCAGAACGATCAGGACCTCTACCTTTTCACCTCATCGGAGTTTT | 3153                 |
| GhiFAD78-3A | AAAATACTATCGGGAGCCAGAACGATCAGGACCTCTACCTTTTCACCTCATCGGAGTTTT | 2958                 |
|             | ***** ***** ***** *****                                      |                      |
| GraFAD78-3D | TATAAGAAGCTTGAAGGAAGATCACTACGTTAGTGACACTGGCGATGTTGTCTACTAC-A | 3198                 |
| GhiFAD78-3D | TATAAGAAGCTTGAAGGAAGATCACTACGTTAGTGACACCGGCGATGTTGTCTACTAC-A | 2994                 |
| GheFAD78-3A | TATAAGAAGCTTGAAGGAAGATCACTACGTTAGTGACACCGGCGATGTTGTCTACTACCA | 3213                 |
| GhiFAD78-3A | TATAAGAAGCTTGAAGGAAGATCACTACGTTAGTGACACCGGCGATGTTGTCTACTACCA | 3018                 |
|             | ***** ***** ***** *****                                      |                      |
| GraFAD78-3D | AAACTGACCCAAACATTTTCAAGTCAGCATGATGCTTCATAAAACTTCAAGCTTTTTGAA | 3258                 |
| GhiFAD78-3D | AAACTGACCCAAACATTTTCAAGTCAGCATGATGCTTCATAAAACTTCAAGCTTTTTGAA | C25R 3035            |
| GheFAD78-3A | AAACTGACCCAAACATTTTCAAGTCAGCATGATGCTTCATAAAACTTCAA-----      | C23R 3263            |
| GhiFAD78-3A | AAACTGACCCAAACATTTTCAAGTCAGCATGATGCTTCATAAAACTTCAA-----      | C25R 3059            |
|             | *****                                                        |                      |
| GraFAD78-3D | CCGGACTCGGGTGTCTTAACCATAAGAGATCTAAGCACTGAACCTTGTATGGCCAT     | C22R 3313            |
| GhiFAD78-3D | -----                                                        |                      |
| GheFAD78-3A | -----                                                        |                      |
| GhiFAD78-3A | -----                                                        |                      |
